# Supplementary material for: Palladium-catalyzed direct C–H arylation of ferrocenecarboxamides with aryl halides
Source: Royal Society of Chemistry journal article supplement (doi:10.1039/c6ra11972g), 2016-01-01

## Supporting Information

### Palladium-Catalyzed Direct C-H Arylation of Ferrocenecarboxamides with Aryl Halides

Huijie Qiao,<sup>a</sup> Suyan Sun,<sup>a</sup> Fan Yang,<sup>\*a</sup> Yu Zhu,<sup>a</sup> Weiguo Zhu,<sup>a</sup> Yusheng Wu,<sup>\*b,c</sup> and Yangjie Wu<sup>\*a</sup>

<sup>a</sup> *The College of Chemistry and Molecular Engineering, Henan Key Laboratory of Chemical Biology and Organic Chemistry, Key Laboratory of Applied Chemistry of Henan Universities, Zhengzhou University, Zhengzhou 450052, People's Republic of China*

<sup>b</sup> *Tetranov Biopharm, LLC, 75 Daxue Road, Zhengzhou, 450052, People's Republic of China*

<sup>c</sup> *Collaborative Innovation Center of New Drug Research and Safety Evaluation, Henan Province, PR China.*

\*E-mail: yangf@zzu.edu.cn; wyj@zzu.edu.cn; yusheng.wu@tetranovglobal.com

#### Contents

|                                                                   |           |
|-------------------------------------------------------------------|-----------|
| <b>1. Preparation of Substrates</b>                               | <b>S2</b> |
| <b>2. Optimization of Reaction Conditions</b>                     | <b>S2</b> |
| <b>3. References</b>                                              | <b>S3</b> |
| <b>4. The Single Crystal X-ray Diffraction Study of 3a and 5a</b> | <b>S3</b> |
| <b>5. Copies of NMR Spectra for the Products</b>                  | <b>S7</b> |

## 1. Preparation of Substrates

All amides were prepared from the corresponding ferrocenecarboxylic acid and amines according to the reported procedure.<sup>[1]</sup>

## 2. Optimization of Reaction Conditions

A 25 mL schlenk tube was equipped with a magnetic stir bar and charged with **1a** (71.2 mg, 0.2 mmol), **2a** (63  $\mu$ L, 0.6 mmol, 3 equiv), base (0.4 mmol, 2 equiv), catalyst (0.02 mmol, 10 mol %), ligand (0.02 mmol, 10 mol %), PivOH (6.2mg, 0.06 mmol, 30 mol %) in solvent (1.0 mL). The resulting mixture was heated under nitrogen at 140 °C for 21 h, and cooled to room temperature. Upon completion, CH<sub>2</sub>Cl<sub>2</sub> (20 mL) was added to the reaction system, and the resulting mixture was filtered through a pad of Celite. The filtrate was extracted with H<sub>2</sub>O (20 mL), and the aqueous layer was extracted with CH<sub>2</sub>Cl<sub>2</sub> (2  $\times$  10 mL). The combined organic layer was dried over anhydrous Na<sub>2</sub>SO<sub>4</sub> and filtered. After evaporation of the solvent under vacuum, the residue was purified by column chromatography on silica gel (100–200 mesh) using hexane-EtOAc as an eluent to afford the pure product **3a**.

**Table S1 Screening of Reaction Conditions<sup>a</sup>**

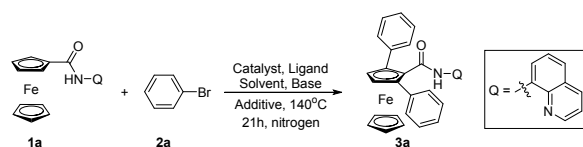

| Entry | Solvent            | Base                            | Catalyst                                  | Ligand           | Additive | Yield(%) <sup>[b]</sup> |
|-------|--------------------|---------------------------------|-------------------------------------------|------------------|----------|-------------------------|
| 1     | toluene            | K <sub>2</sub> CO <sub>3</sub>  | Pd(OAc) <sub>2</sub>                      | PPh <sub>3</sub> | PivOH    | 8                       |
| 2     | DCE                | K <sub>2</sub> CO <sub>3</sub>  | Pd(OAc) <sub>2</sub>                      | PPh <sub>3</sub> | PivOH    | Trace                   |
| 3     | dioxane            | K <sub>2</sub> CO <sub>3</sub>  | Pd(OAc) <sub>2</sub>                      | PPh <sub>3</sub> | PivOH    | Trace                   |
| 4     | CH <sub>3</sub> CN | K <sub>2</sub> CO <sub>3</sub>  | Pd(OAc) <sub>2</sub>                      | PPh <sub>3</sub> | PivOH    | Trace                   |
| 5     | DMF                | K <sub>2</sub> CO <sub>3</sub>  | Pd(OAc) <sub>2</sub>                      | PPh <sub>3</sub> | PivOH    | Trace                   |
| 6     | <i>o</i> -xylene   | K <sub>2</sub> CO <sub>3</sub>  | Pd(OAc) <sub>2</sub>                      | PPh <sub>3</sub> | PivOH    | 30                      |
| 7     | <i>o</i> -xylene   | Na <sub>2</sub> CO <sub>3</sub> | Pd(OAc) <sub>2</sub>                      | PPh <sub>3</sub> | PivOH    | 20                      |
| 8     | <i>o</i> -xylene   | Cs <sub>2</sub> CO <sub>3</sub> | Pd(OAc) <sub>2</sub>                      | PPh <sub>3</sub> | PivOH    | Trace                   |
| 9     | <i>o</i> -xylene   | K <sub>3</sub> PO <sub>4</sub>  | Pd(OAc) <sub>2</sub>                      | PPh <sub>3</sub> | PivOH    | 18                      |
| 10    | <i>o</i> -xylene   | KHCO <sub>3</sub>               | Pd(OAc) <sub>2</sub>                      | PPh <sub>3</sub> | PivOH    | Trace                   |
| 11    | <i>o</i> -xylene   | K <sub>2</sub> CO <sub>3</sub>  | -                                         | PPh <sub>3</sub> | PivOH    | Trace                   |
| 12    | <i>o</i> -xylene   | K <sub>2</sub> CO <sub>3</sub>  | PdCl <sub>2</sub>                         | PPh <sub>3</sub> | PivOH    | 11                      |
| 13    | <i>o</i> -xylene   | K <sub>2</sub> CO <sub>3</sub>  | Pd <sub>2</sub> dba <sub>3</sub>          | PPh <sub>3</sub> | PivOH    | 17                      |
| 14    | <i>o</i> -xylene   | K <sub>2</sub> CO <sub>3</sub>  | Pd(CF <sub>3</sub> COO) <sub>2</sub>      | PPh <sub>3</sub> | PivOH    | 10                      |
| 15    | <i>o</i> -xylene   | K <sub>2</sub> CO <sub>3</sub>  | Ni(OAc) <sub>2</sub>                      | PPh <sub>3</sub> | PivOH    | Trace                   |
| 16    | <i>o</i> -xylene   | K <sub>2</sub> CO <sub>3</sub>  | [RuCl <sub>2</sub> (cymene)] <sub>2</sub> | PPh <sub>3</sub> | PivOH    | Trace                   |
| 17    | <i>o</i> -xylene   | K <sub>2</sub> CO <sub>3</sub>  | Pd(OAc) <sub>2</sub>                      | PPy <sub>3</sub> | PivOH    | 23                      |
| 18    | <i>o</i> -xylene   | K <sub>2</sub> CO <sub>3</sub>  | Pd(OAc) <sub>2</sub>                      | DPPF             | PivOH    | 49                      |
| 19    | <i>o</i> -xylene   | K <sub>2</sub> CO <sub>3</sub>  | Pd(OAc) <sub>2</sub>                      | RuPhos           | PivOH    | 61                      |

|                   |                  |                                |                      |                      |        |    |
|-------------------|------------------|--------------------------------|----------------------|----------------------|--------|----|
| 20                | <i>o</i> -xylene | K <sub>2</sub> CO <sub>3</sub> | Pd(OAc) <sub>2</sub> | XPhos                | PivOH  | 83 |
| 21                | <i>o</i> -xylene | K <sub>2</sub> CO <sub>3</sub> | Pd(OAc) <sub>2</sub> | XantPhos             | PivOH  | 42 |
| 22                | <i>o</i> -xylene | K <sub>2</sub> CO <sub>3</sub> | Pd(OAc) <sub>2</sub> | <sup>t</sup> BuXPhos | PivOH  | 60 |
| 23                | <i>o</i> -xylene | K <sub>2</sub> CO <sub>3</sub> | Pd(OAc) <sub>2</sub> | XPhos                | AcOH   | 61 |
| 24                | <i>o</i> -xylene | K <sub>2</sub> CO <sub>3</sub> | Pd(OAc) <sub>2</sub> | XPhos                | AcOK   | 75 |
| 25                | <i>o</i> -xylene | K <sub>2</sub> CO <sub>3</sub> | Pd(OAc) <sub>2</sub> | XPhos                | PhCOOH | 74 |
| 26                | <i>o</i> -xylene | K <sub>2</sub> CO <sub>3</sub> | Pd(OAc) <sub>2</sub> | XPhos                | -      | 72 |
| 27 <sup>[c]</sup> | <i>o</i> -xylene | K <sub>2</sub> CO <sub>3</sub> | Pd(OAc) <sub>2</sub> | XPhos                | PivOH  | 82 |
| 28 <sup>[d]</sup> | <i>o</i> -xylene | K <sub>2</sub> CO <sub>3</sub> | Pd(OAc) <sub>2</sub> | XPhos                | PivOH  | 51 |

<sup>a</sup> Reaction conditions: **1a** (0.2 mmol), **2a** (0.6 mmol), Catalyst (0.02 mmol), Ligand (0.02 mmol), PivOH (0.06 mmol), Base (0.4 mmol) and Solvent (1.0 mL) under nitrogen at 140 °C for 21 h unless otherwise noted. <sup>b</sup> Isolated yield based on **1a**. <sup>c</sup> Without PivOH. <sup>d</sup> At 150 °C. <sup>e</sup> At 130 °C.

### 3. References

1. (a) L. D. Tran, J. Roane and O. Daugulis, *Angew. Chem., Int. Ed.* 2013, **52**, 6043; (b) T. Truong, K. Klimovica and O. Daugulis, *J. Am. Chem. Soc.* 2013, **135**, 9342.

### 4. The Single Crystal X-ray Diffraction Study of **3a** and **5a**

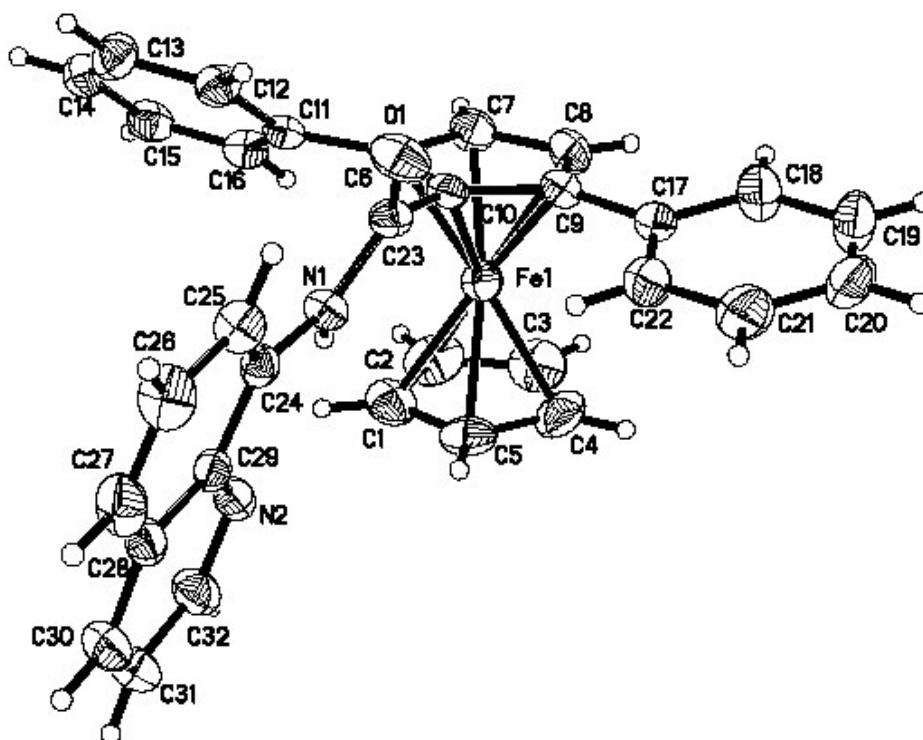

CCDC 1446343 (**3a**) contains the supplementary crystallographic data for this paper. These data can be obtained free of charge from The Cambridge Crystallographic Data Centre *via* [www.ccdc.cam.ac.uk/data\\_request/cif](http://www.ccdc.cam.ac.uk/data_request/cif).

**Table S2 Crystal dData and Structure Refinement for 3a.**

|                                             |                                                               |
|---------------------------------------------|---------------------------------------------------------------|
| Identification code                         | 201506168                                                     |
| Empirical formula                           | C <sub>32</sub> H <sub>24</sub> FeN <sub>2</sub> O            |
| Formula weight                              | 508.38                                                        |
| Temperature/K                               | 291.15                                                        |
| Crystal system                              | monoclinic                                                    |
| Space group                                 | P2 <sub>1</sub> /c                                            |
| a/Å                                         | 11.3423(6)                                                    |
| b/Å                                         | 14.2822(4)                                                    |
| c/Å                                         | 16.0589(7)                                                    |
| α/°                                         | 90                                                            |
| β/°                                         | 107.980(5)                                                    |
| γ/°                                         | 90                                                            |
| Volume/Å <sup>3</sup>                       | 2474.4(2)                                                     |
| Z                                           | 4                                                             |
| ρ <sub>calc</sub> /cm <sup>3</sup>          | 1.365                                                         |
| μ/mm <sup>-1</sup>                          | 5.099                                                         |
| F(000)                                      | 1056.0                                                        |
| Crystal size/mm <sup>3</sup>                | 0.2 × 0.2 × 0.16                                              |
| Radiation                                   | CuKα (λ = 1.54184)                                            |
| 2θ range for data collection/°              | 8.196 to 134.122                                              |
| Index ranges                                | -13 ≤ h ≤ 13, -17 ≤ k ≤ 14, -19 ≤ l ≤ 13                      |
| Reflections collected                       | 9066                                                          |
| Independent reflections                     | 4408 [R <sub>int</sub> = 0.0267, R <sub>sigma</sub> = 0.0364] |
| Data/restraints/parameters                  | 4408/13/325                                                   |
| Goodness-of-fit on F <sup>2</sup>           | 1.018                                                         |
| Final R indexes [I >= 2σ (I)]               | R <sub>1</sub> = 0.0401, wR <sub>2</sub> = 0.0962             |
| Final R indexes [all data]                  | R <sub>1</sub> = 0.0531, wR <sub>2</sub> = 0.1034             |
| Largest diff. peak/hole / e Å <sup>-3</sup> | 0.32/-0.21                                                    |

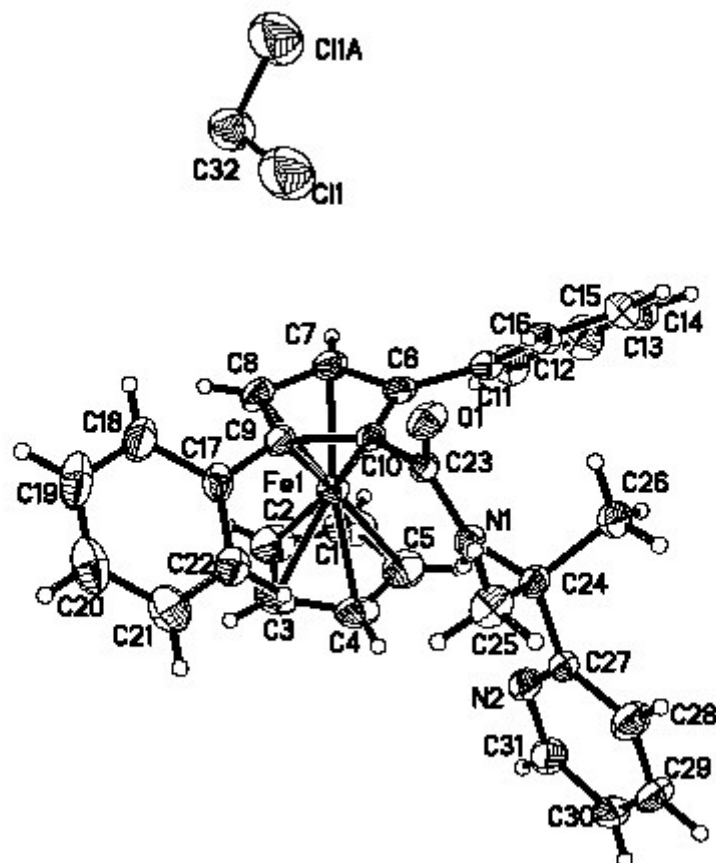

CCDC 1446344 (**5a**) contains the supplementary crystallographic data for this paper. These data can be obtained free of charge from The Cambridge Crystallographic Data Centre *via* [www.ccdc.cam.ac.uk/data\\_request/cif](http://www.ccdc.cam.ac.uk/data_request/cif).

**Table S3 Crystal Data and Structure Refinement for 5a.**

|                                    |                                                                                               |
|------------------------------------|-----------------------------------------------------------------------------------------------|
| Identification code                | 201506167                                                                                     |
| Empirical formula                  | C <sub>63</sub> H <sub>58</sub> Cl <sub>2</sub> Fe <sub>2</sub> N <sub>4</sub> O <sub>2</sub> |
| Formula weight                     | 1085.73                                                                                       |
| Temperature/K                      | 291.15                                                                                        |
| Crystal system                     | monoclinic                                                                                    |
| Space group                        | P2 <sub>1</sub> /c                                                                            |
| a/Å                                | 14.7314(2)                                                                                    |
| b/Å                                | 10.30632(19)                                                                                  |
| c/Å                                | 17.8542(4)                                                                                    |
| α/°                                | 90                                                                                            |
| β/°                                | 95.6050(17)                                                                                   |
| γ/°                                | 90                                                                                            |
| Volume/Å <sup>3</sup>              | 2697.78(9)                                                                                    |
| Z                                  | 2                                                                                             |
| ρ <sub>calc</sub> /cm <sup>3</sup> | 1.337                                                                                         |

|                                                |                                                               |
|------------------------------------------------|---------------------------------------------------------------|
| $\mu/\text{mm}^{-1}$                           | 5.596                                                         |
| F(000)                                         | 1132.0                                                        |
| Crystal size/ $\text{mm}^3$                    | $0.22 \times 0.2 \times 0.17$                                 |
| Radiation                                      | CuK $\alpha$ ( $\lambda = 1.54184$ )                          |
| $2\Theta$ range for data collection/ $^\circ$  | 6.028 to 134.156                                              |
| Index ranges                                   | $-17 \leq h \leq 17, -12 \leq k \leq 6, -21 \leq l \leq 21$   |
| Reflections collected                          | 9723                                                          |
| Independent reflections                        | 4818 [ $R_{\text{int}} = 0.0292, R_{\text{sigma}} = 0.0363$ ] |
| Data/restraints/parameters                     | 4818/4/340                                                    |
| Goodness-of-fit on $F^2$                       | 1.053                                                         |
| Final R indexes [ $I \geq 2\sigma(I)$ ]        | $R_1 = 0.0497, wR_2 = 0.1388$                                 |
| Final R indexes [all data]                     | $R_1 = 0.0625, wR_2 = 0.1497$                                 |
| Largest diff. peak/hole / $e \text{ \AA}^{-3}$ | 0.68/-0.64                                                    |

## 5. Copies of NMR Spectra for the Products

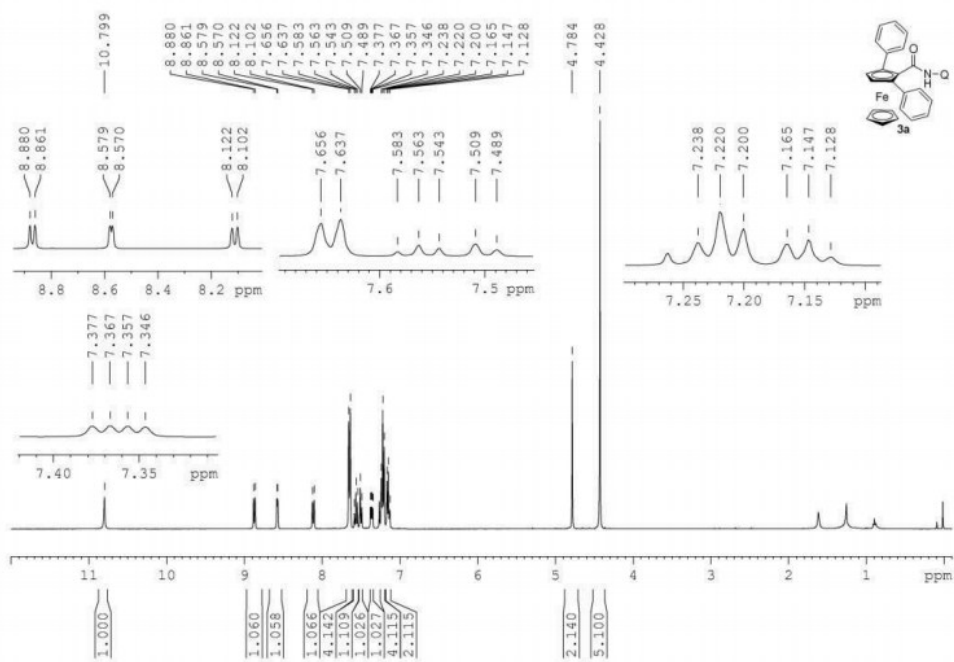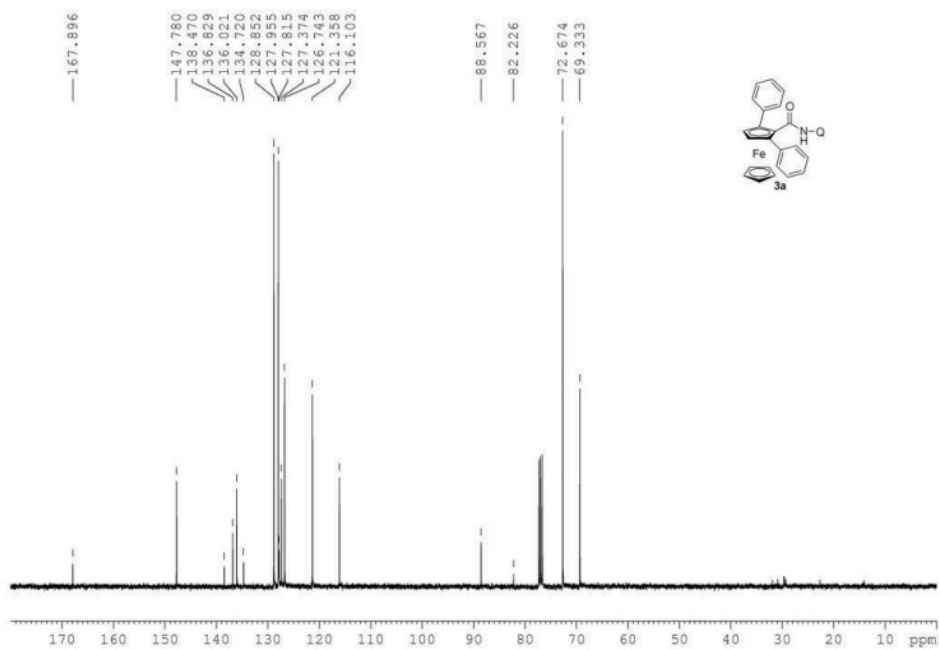

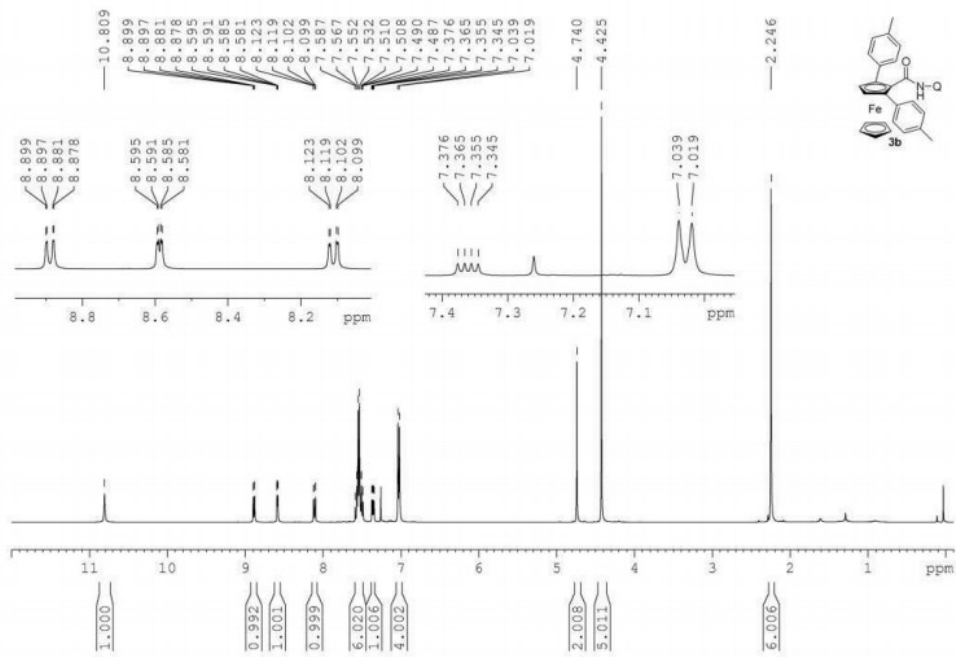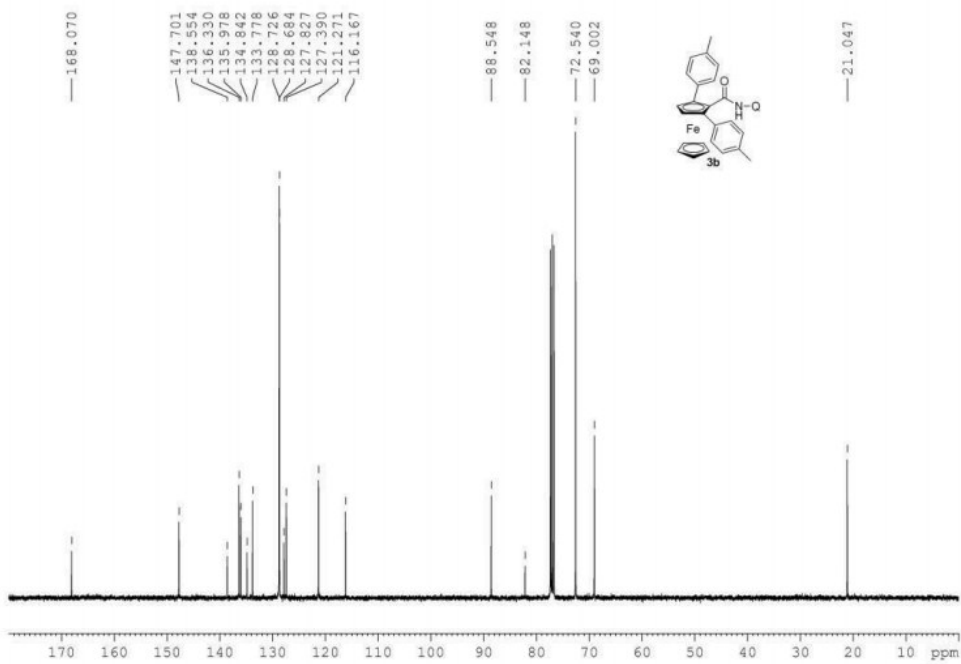



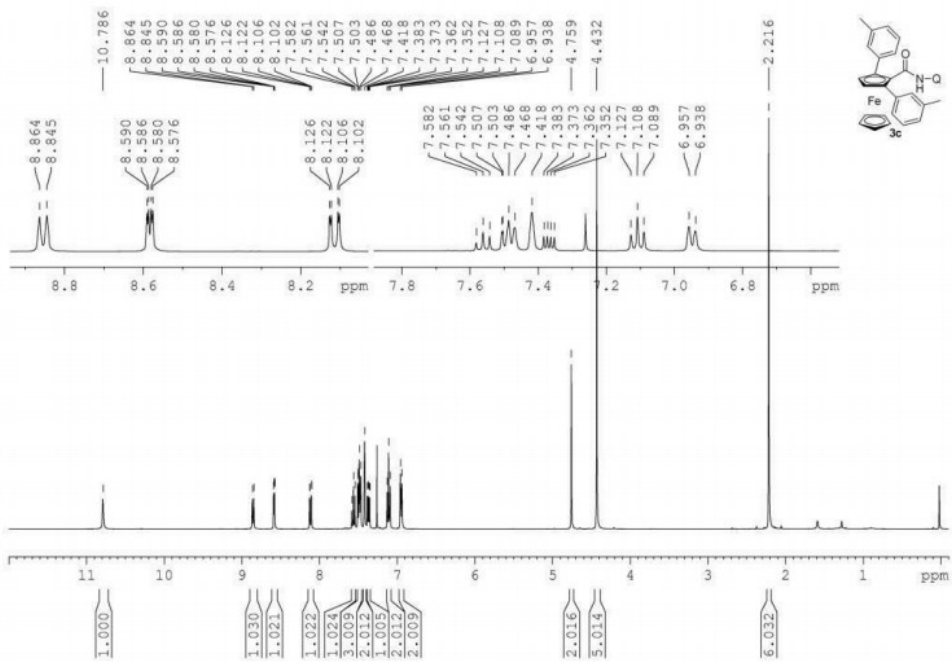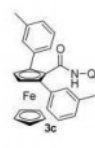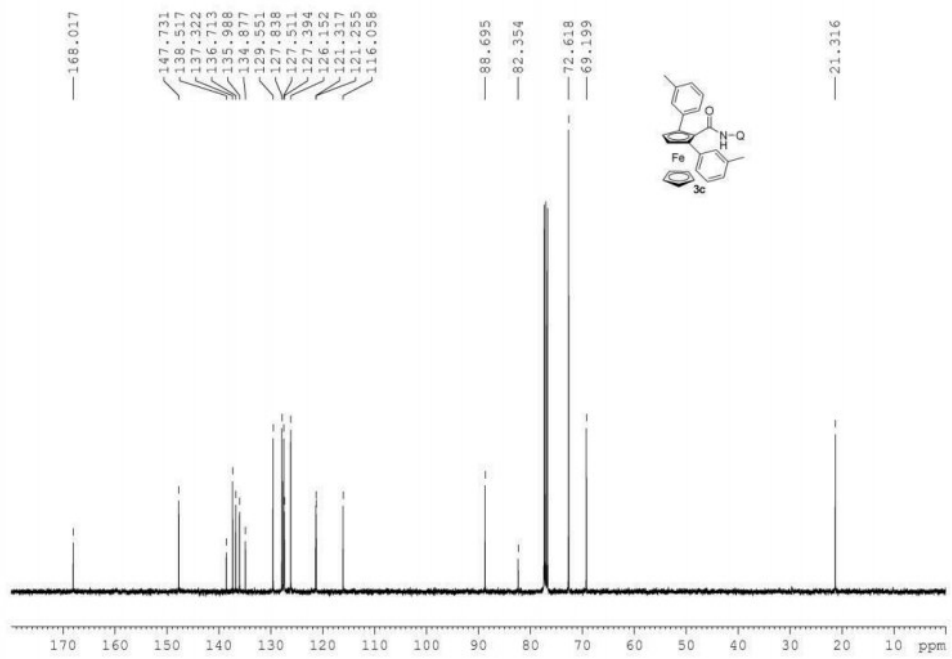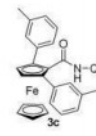

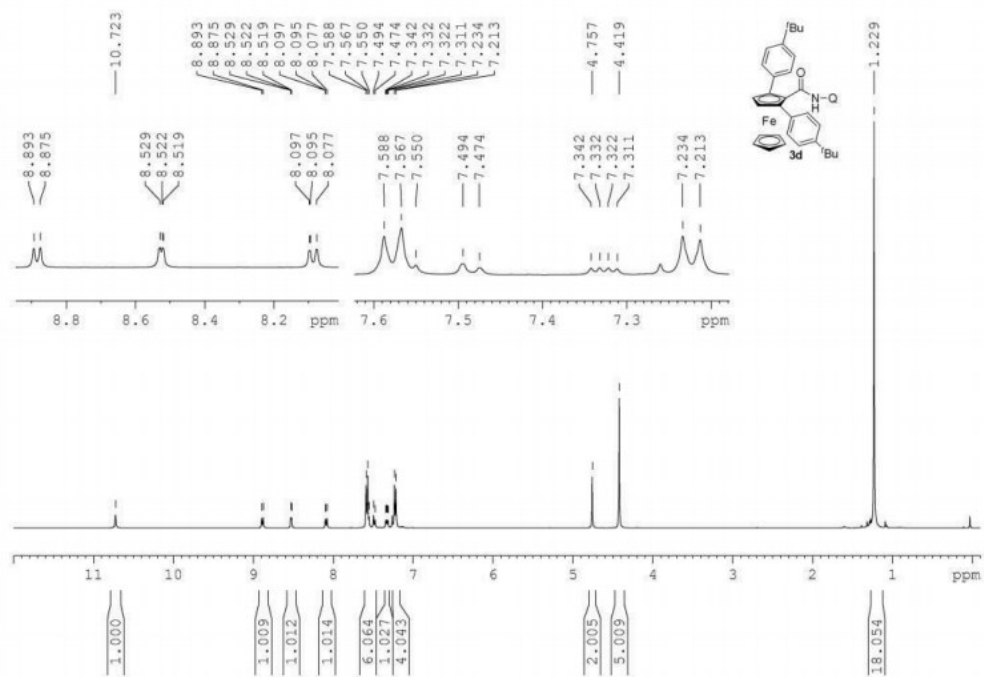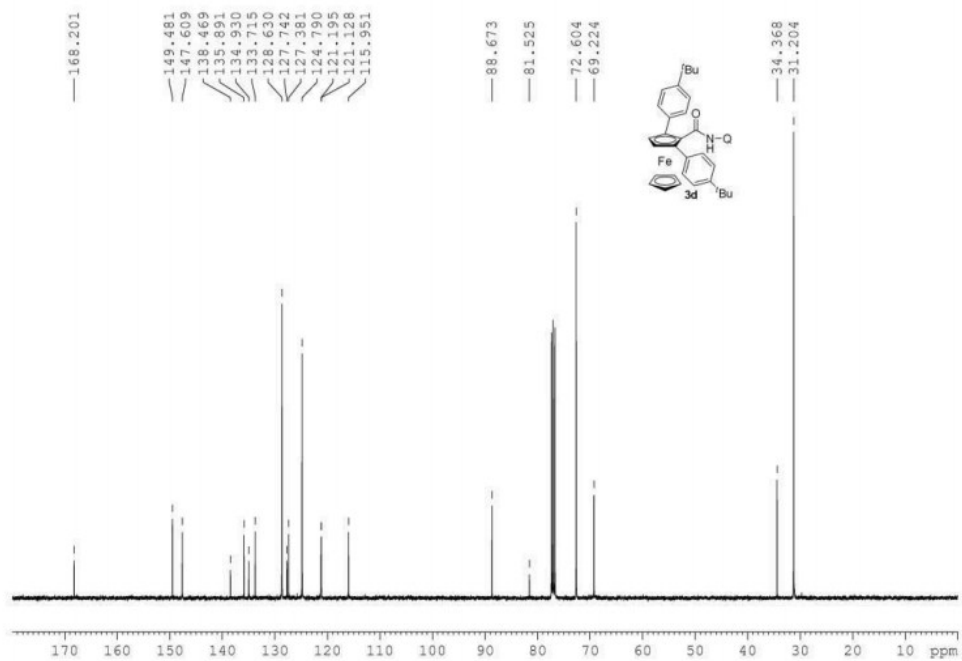

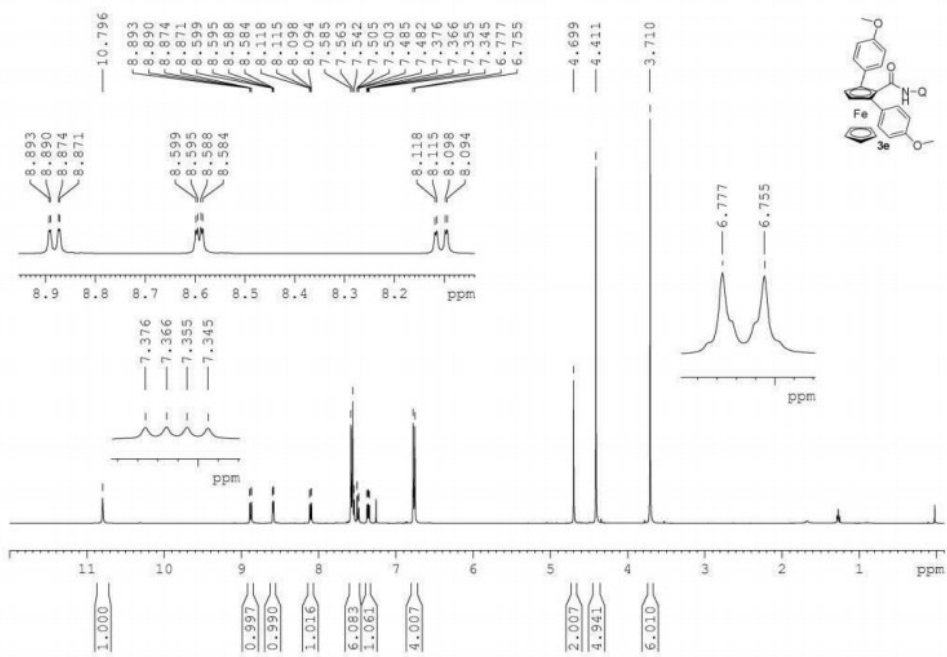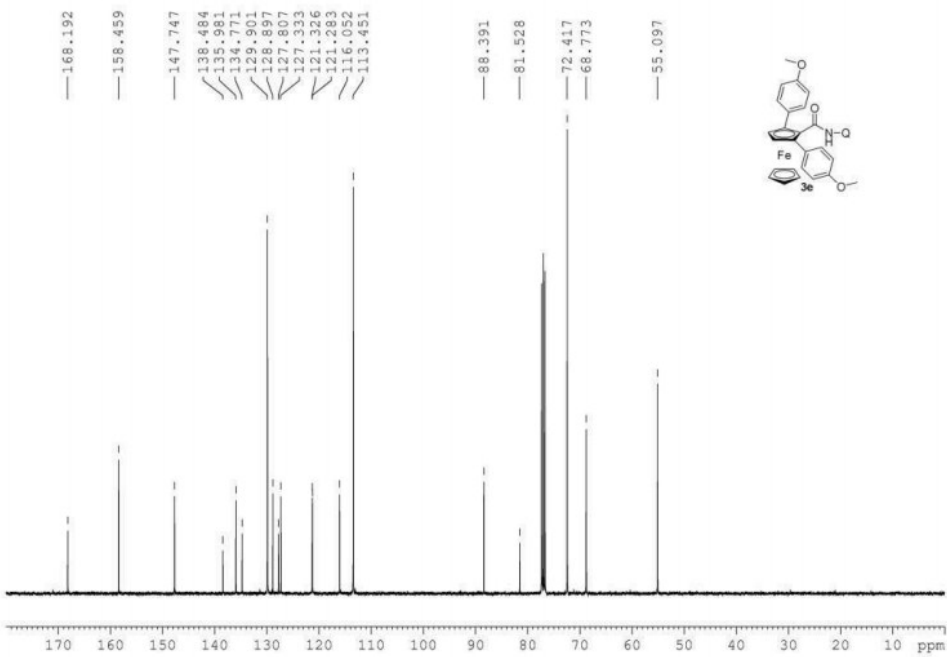

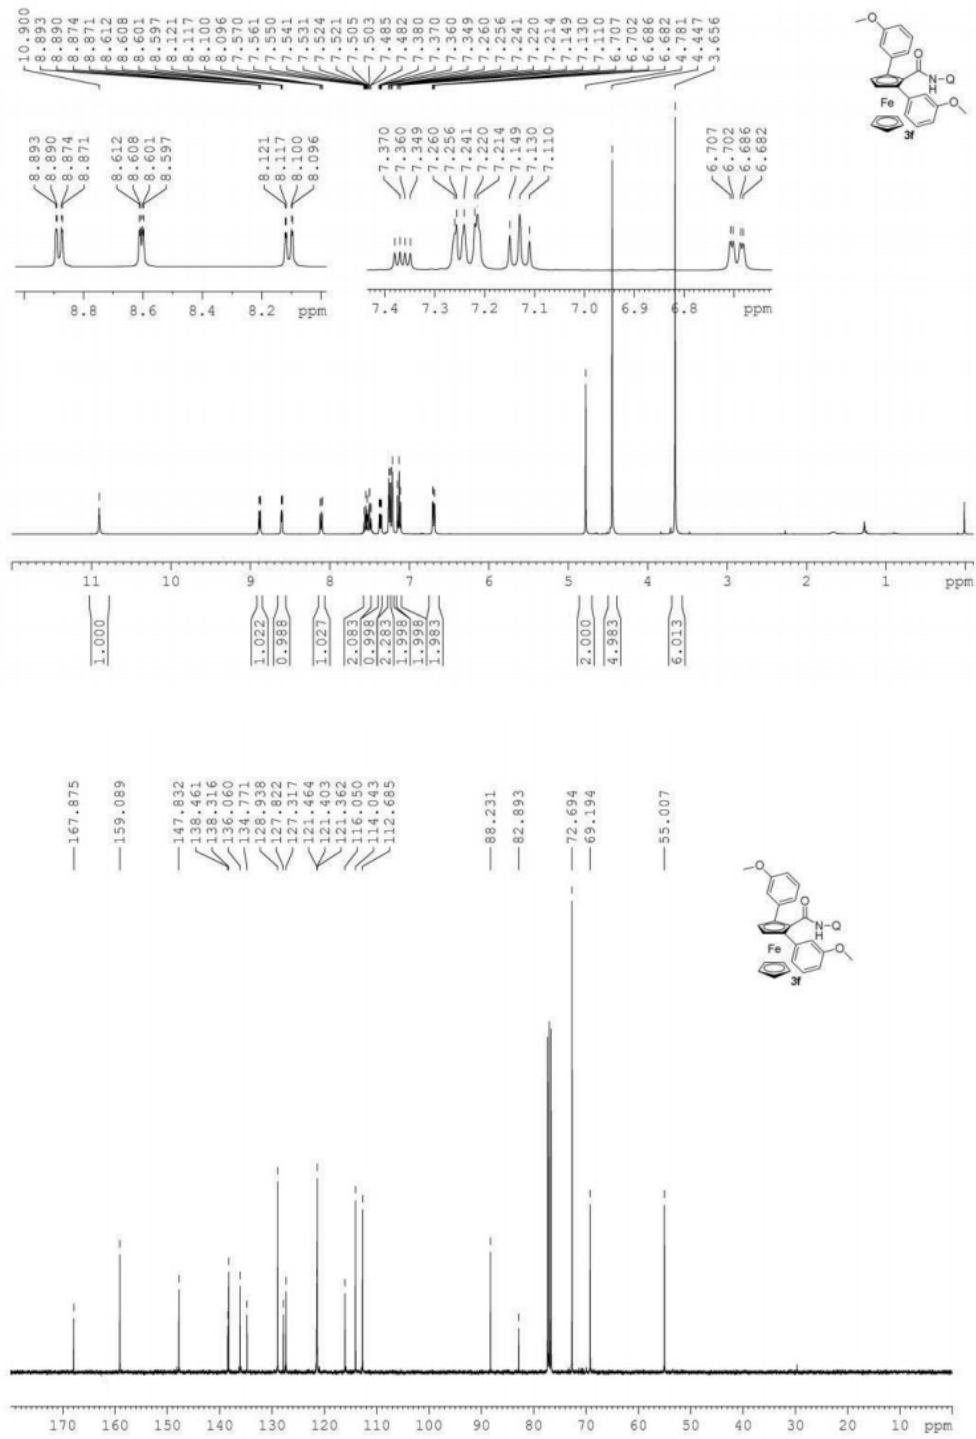

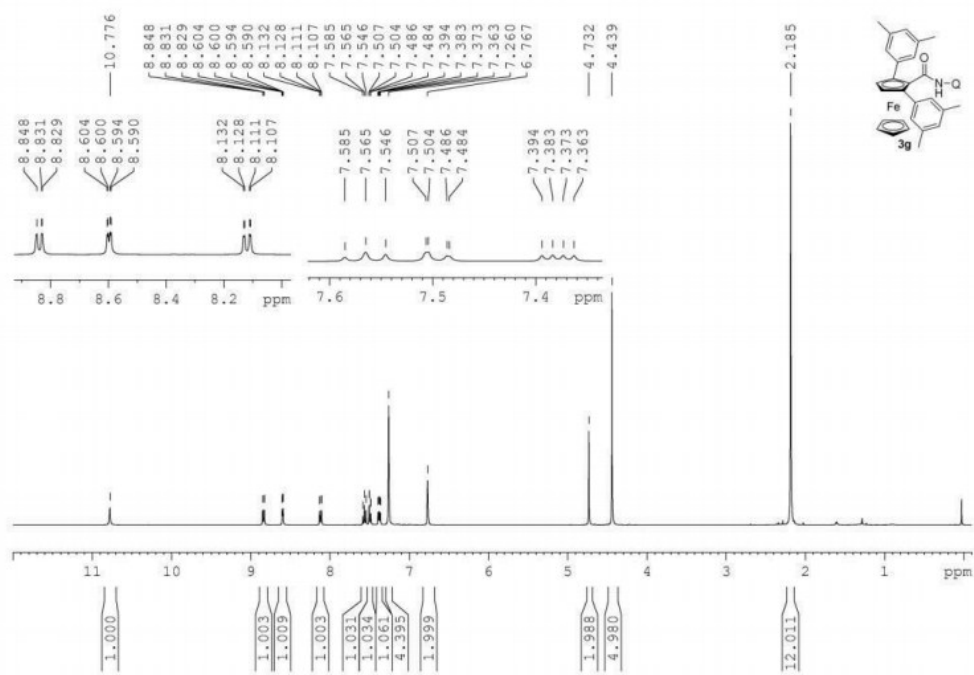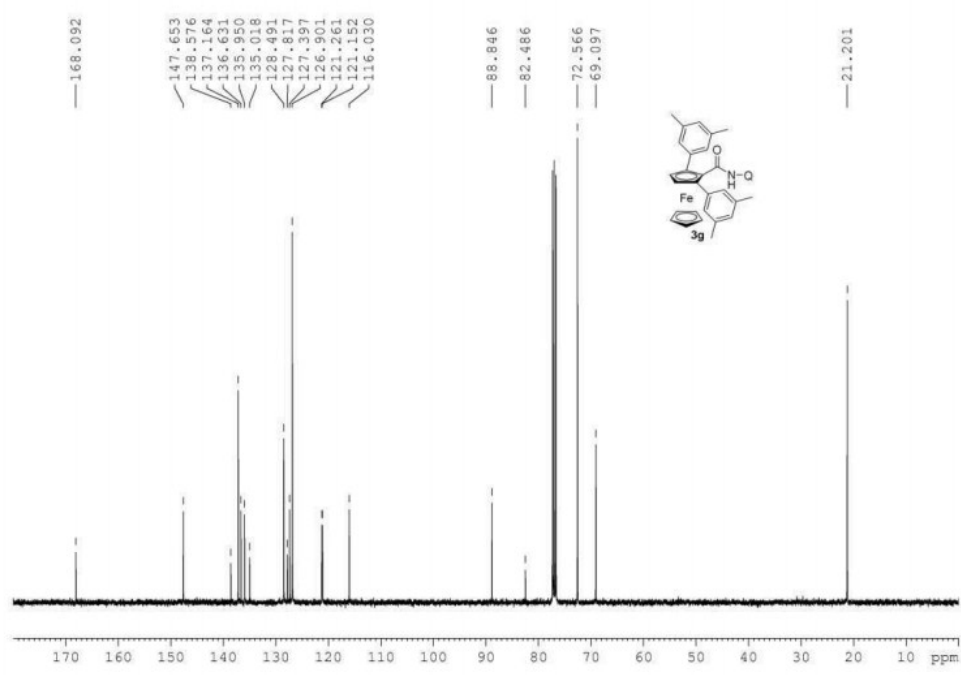

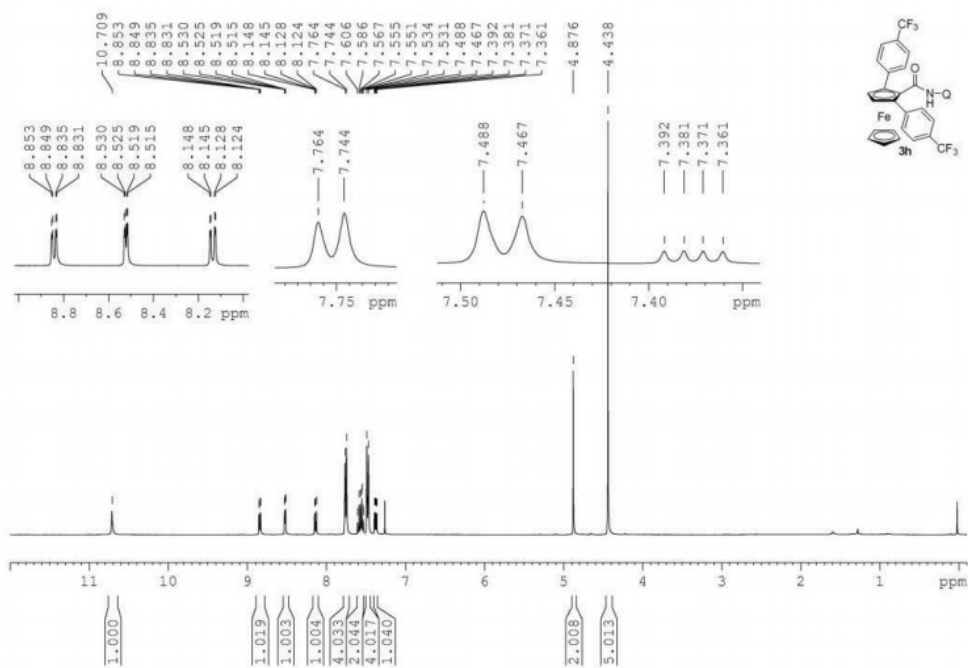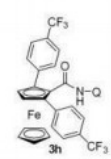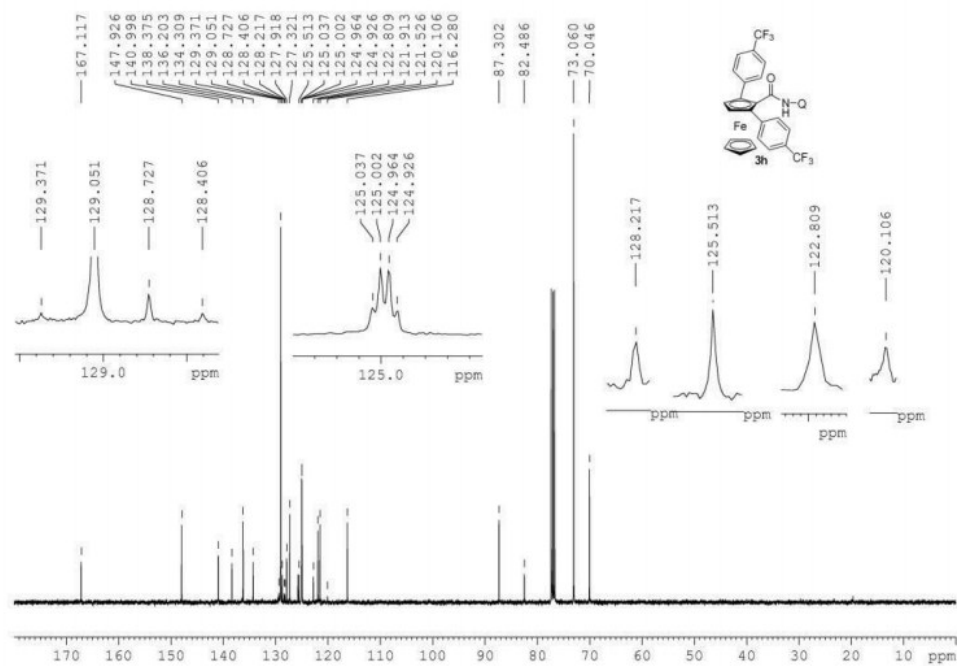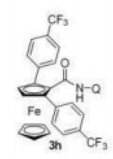

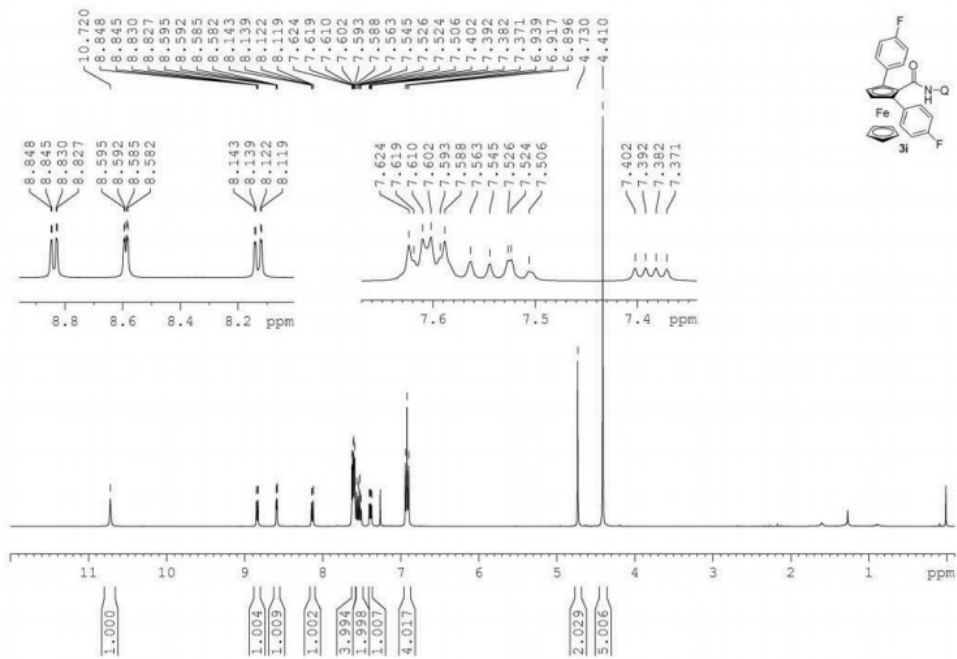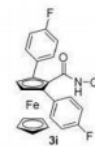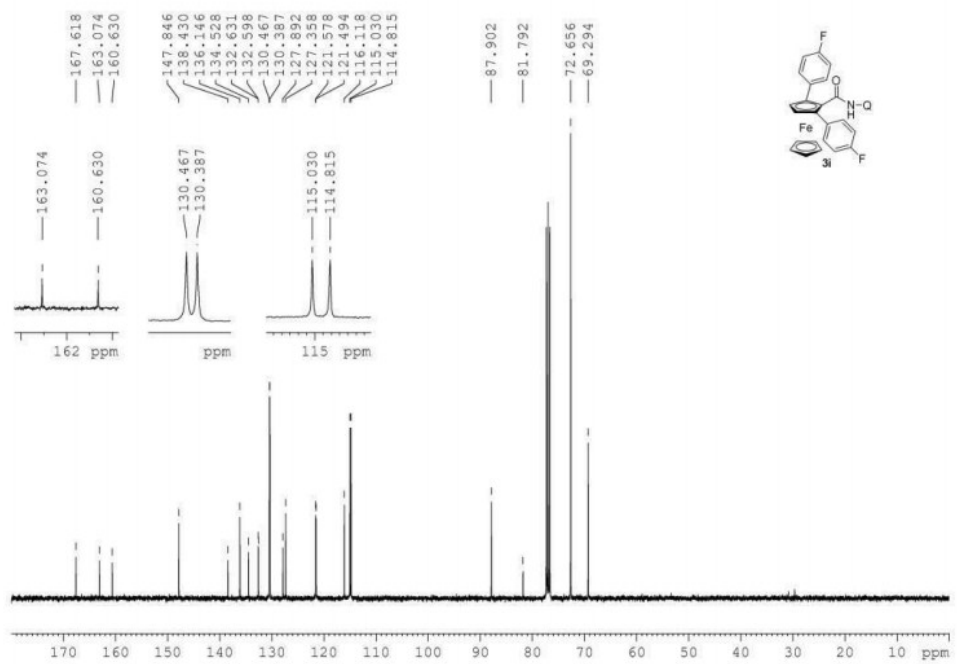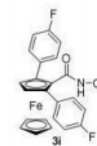

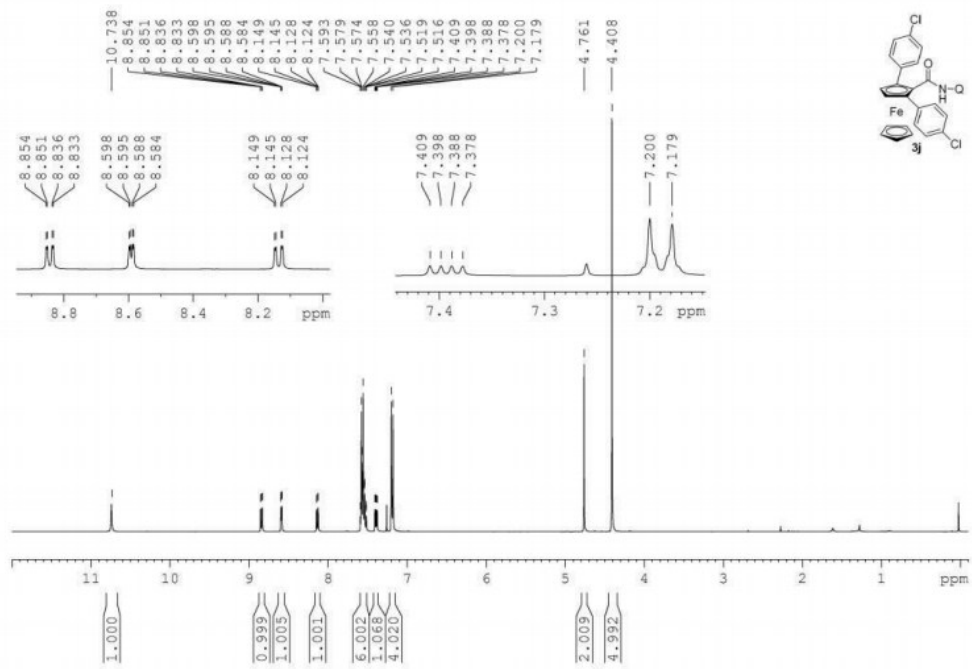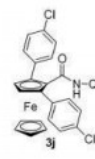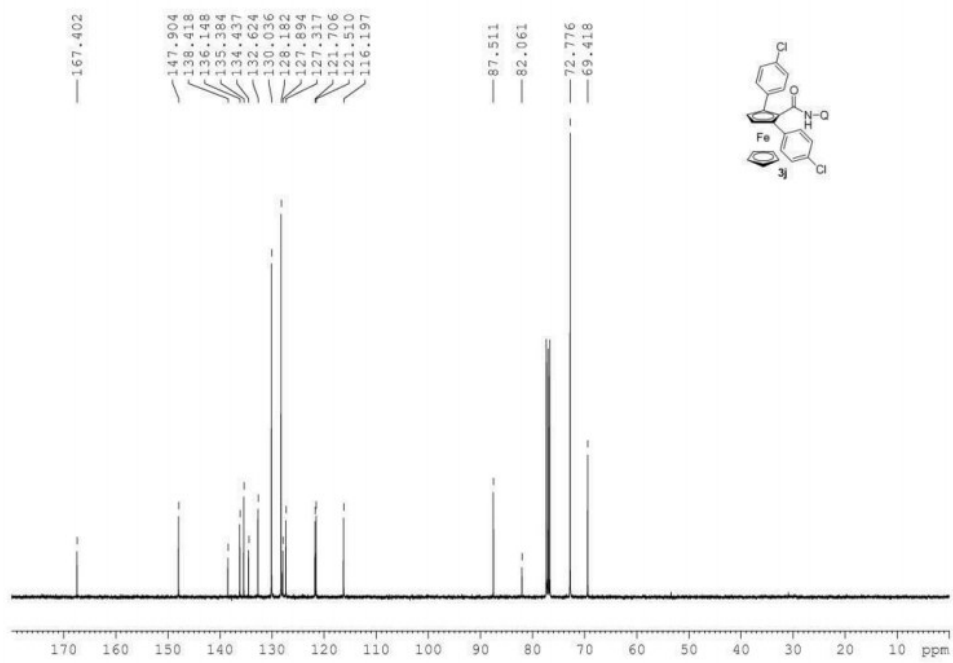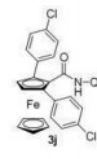



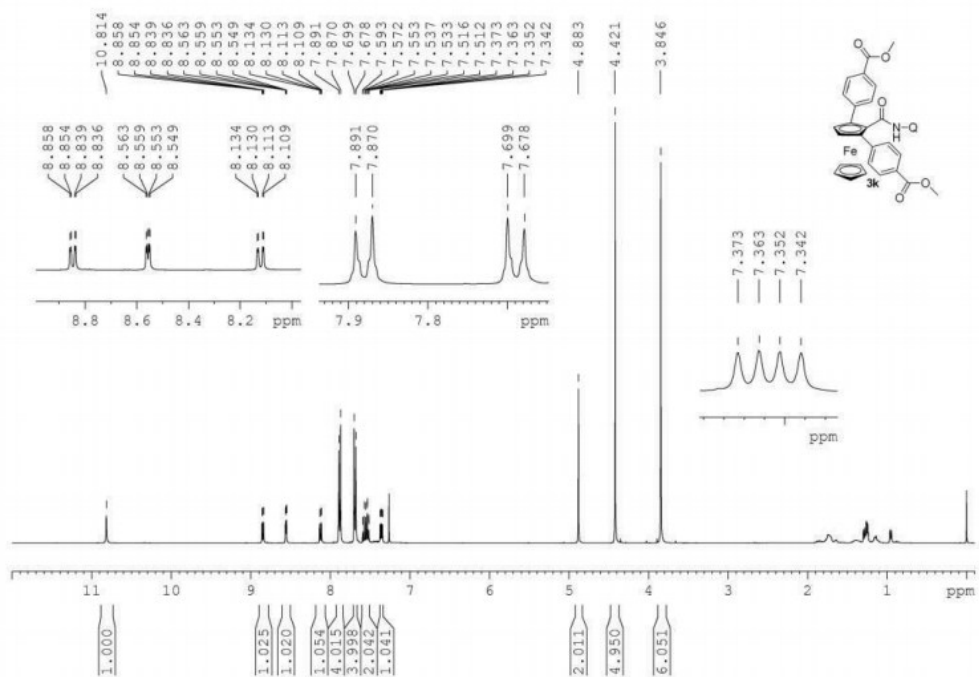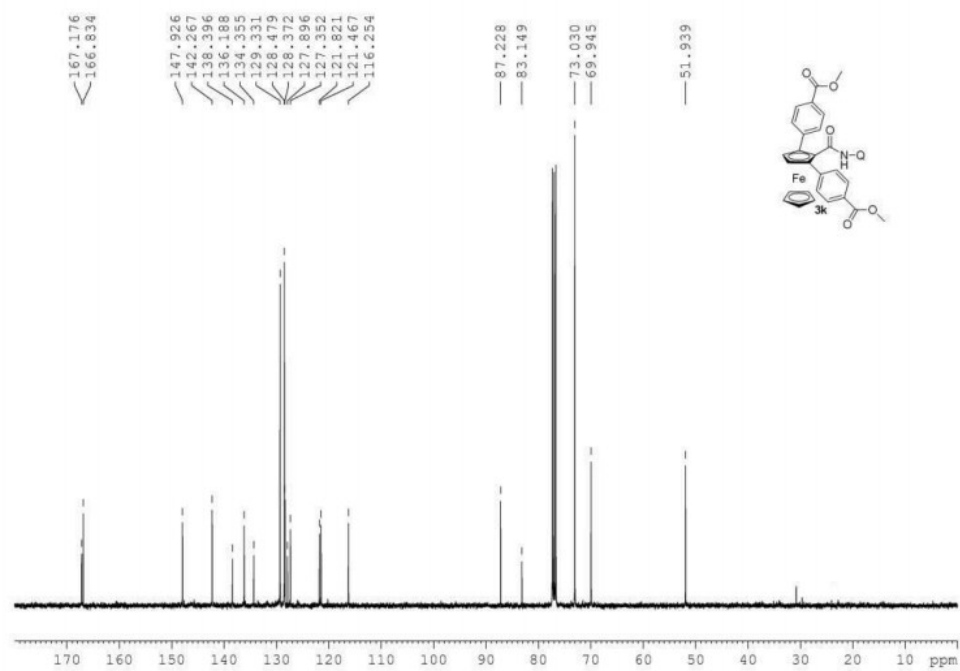

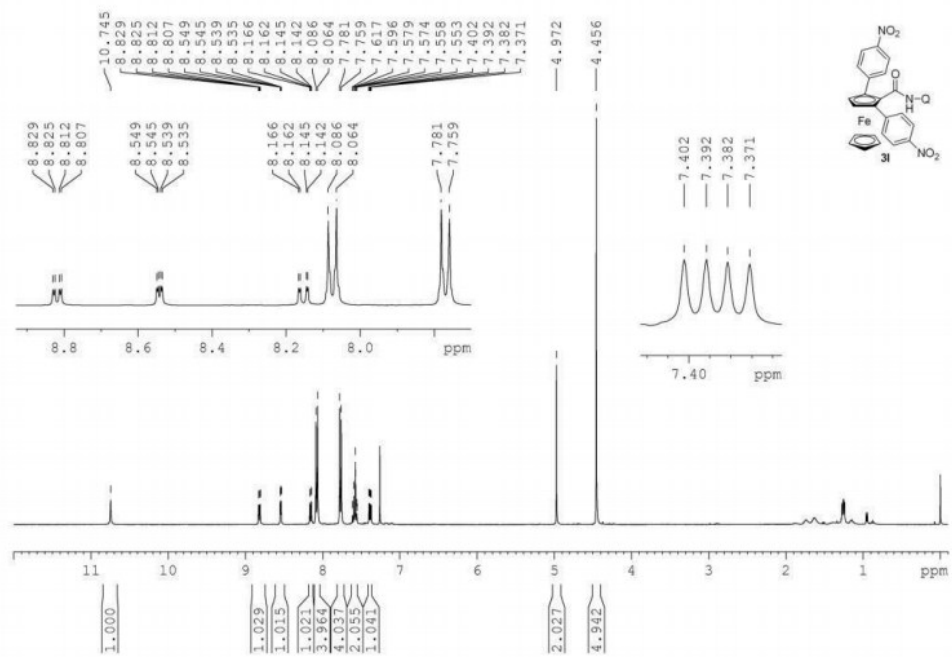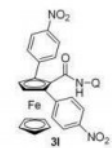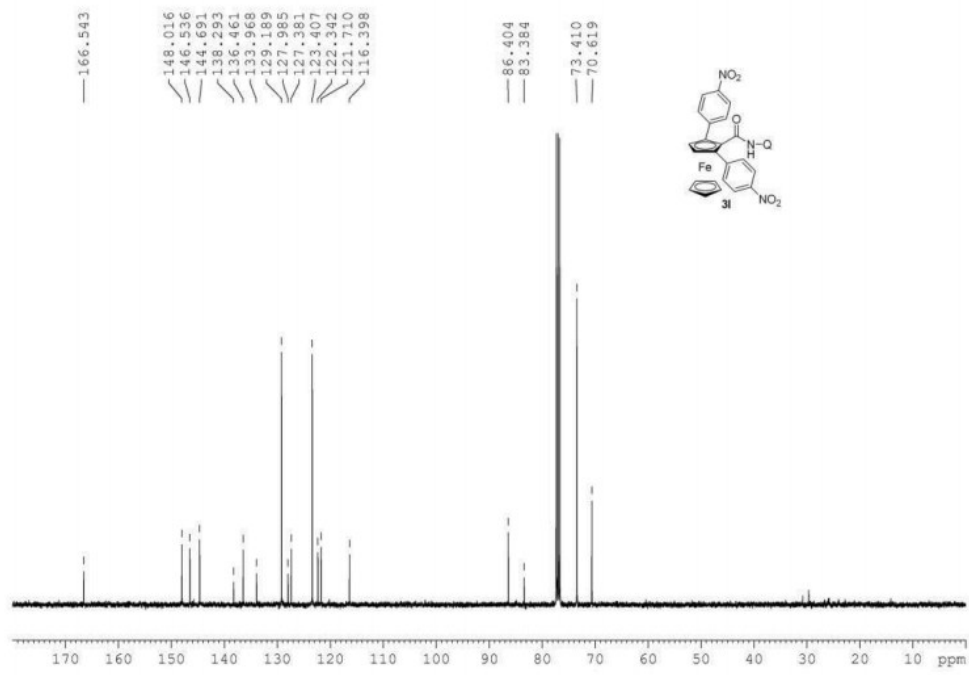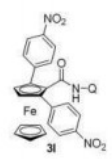

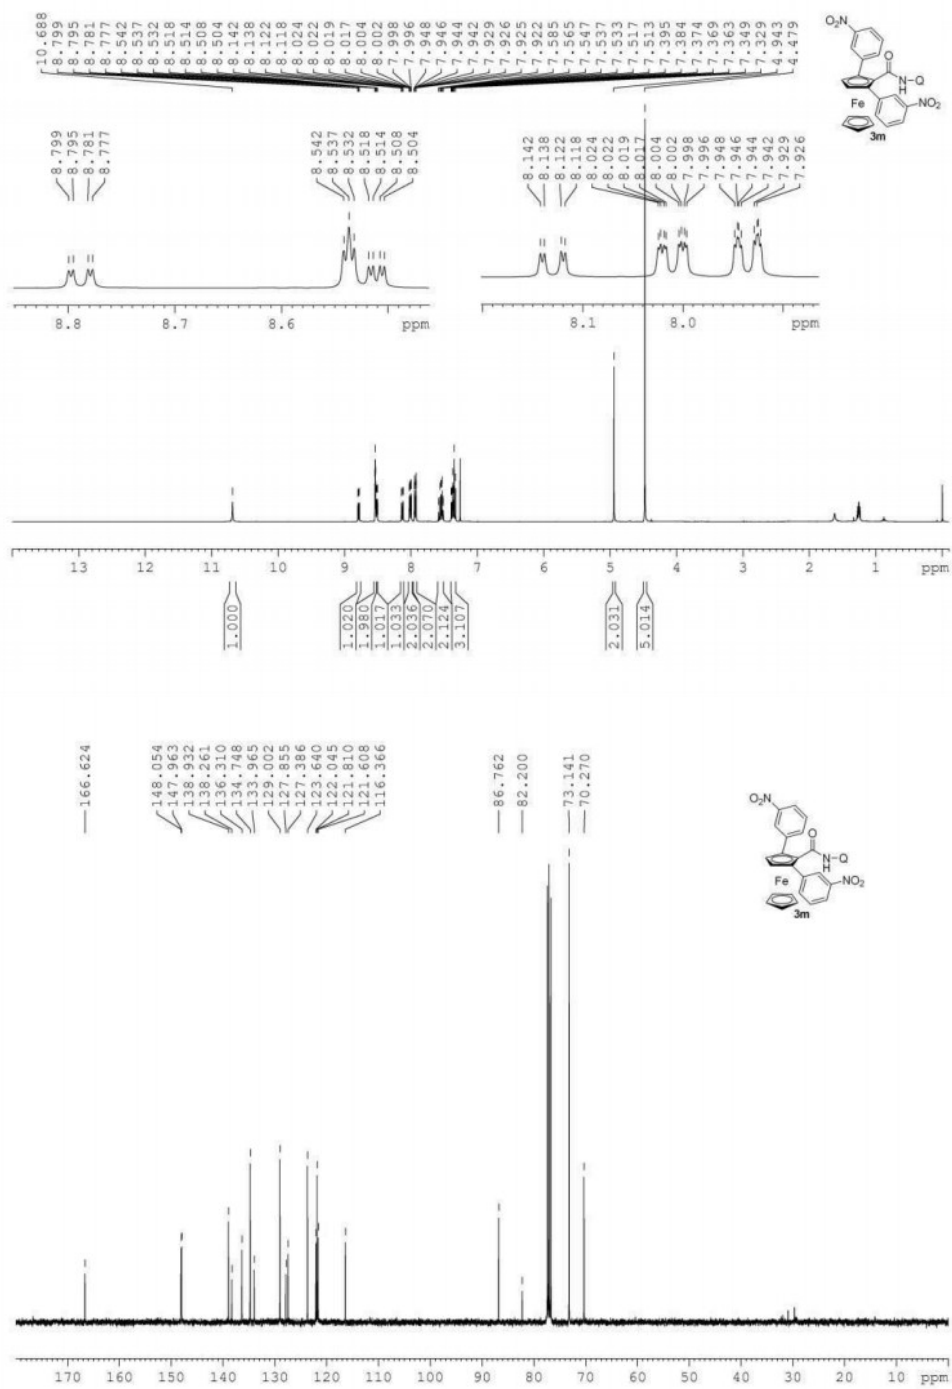

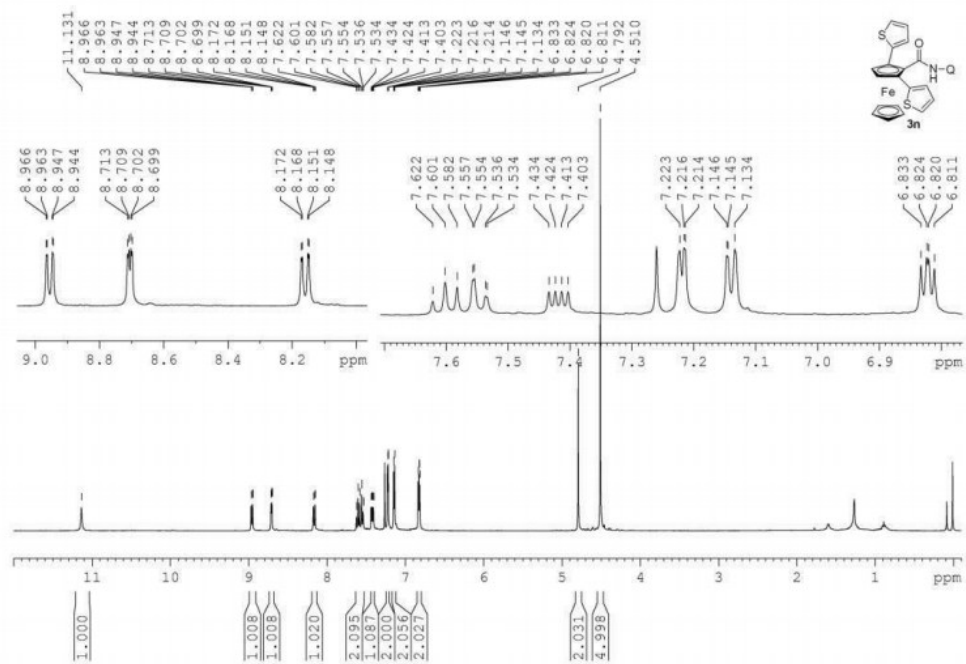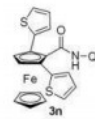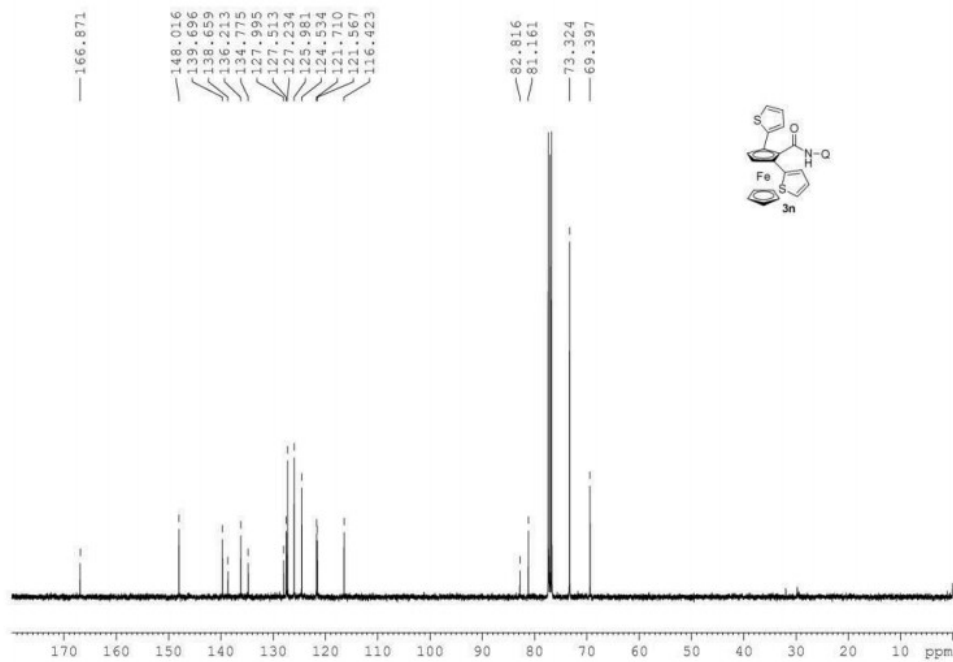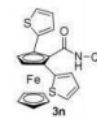

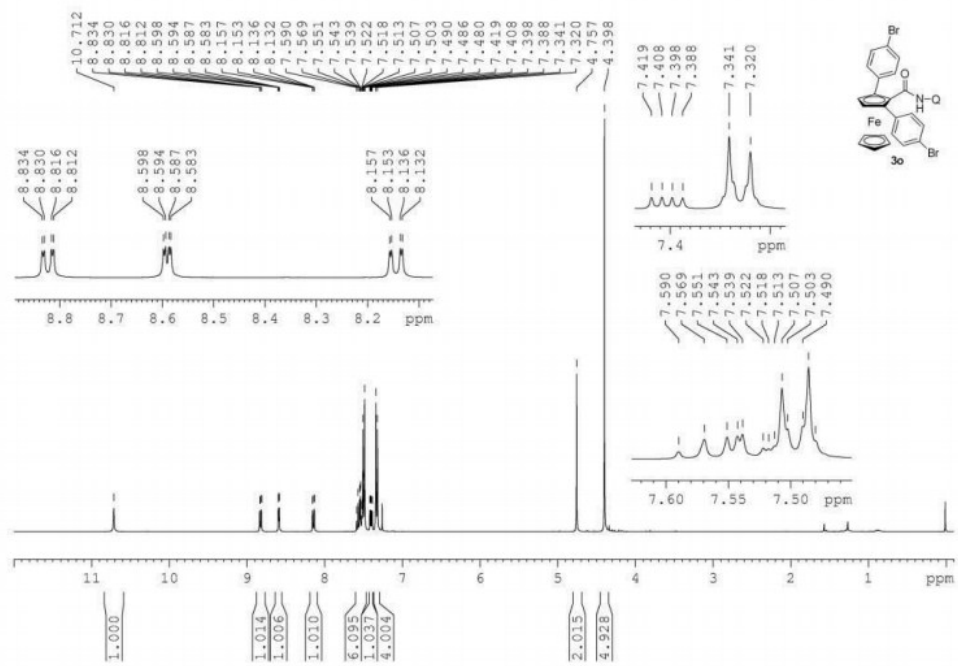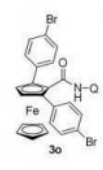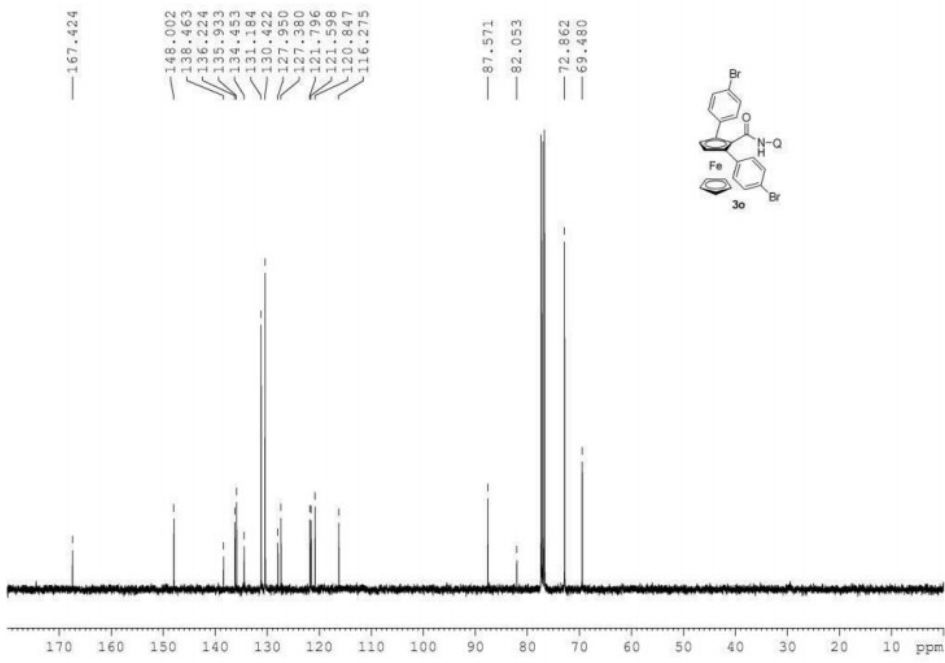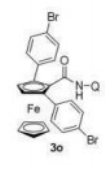

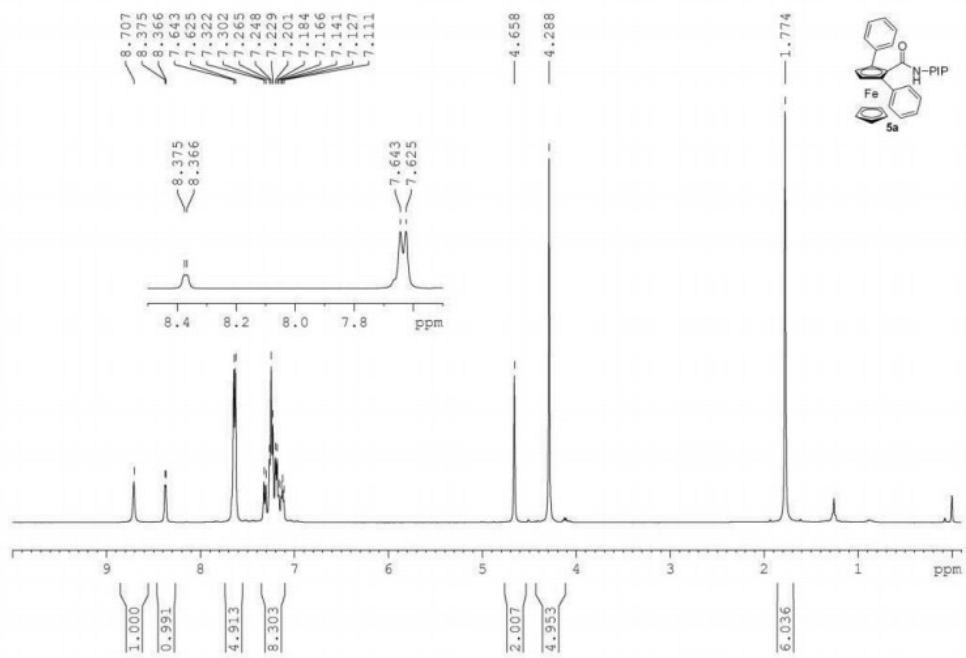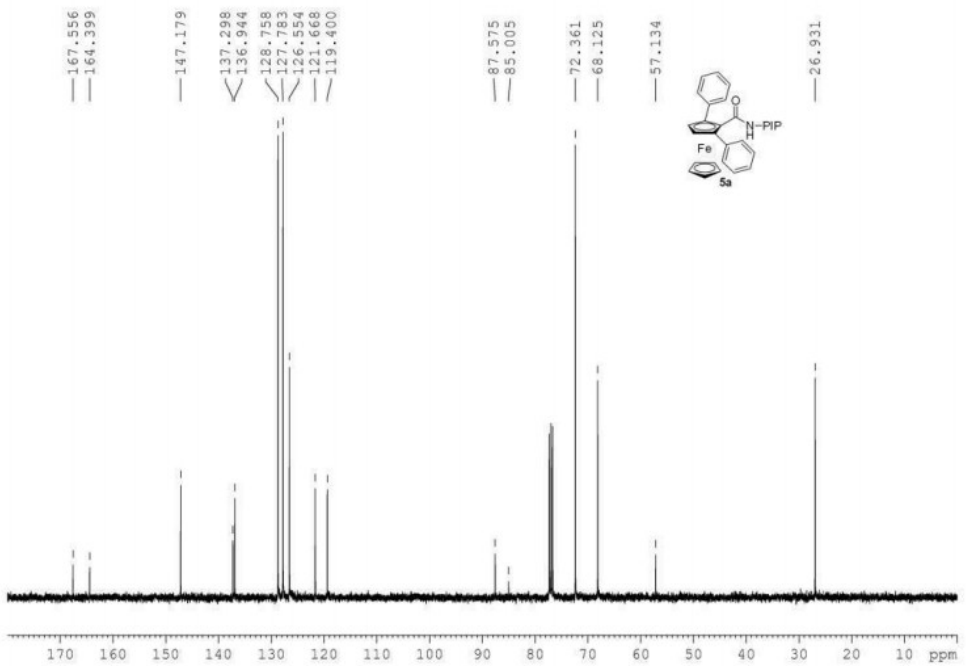

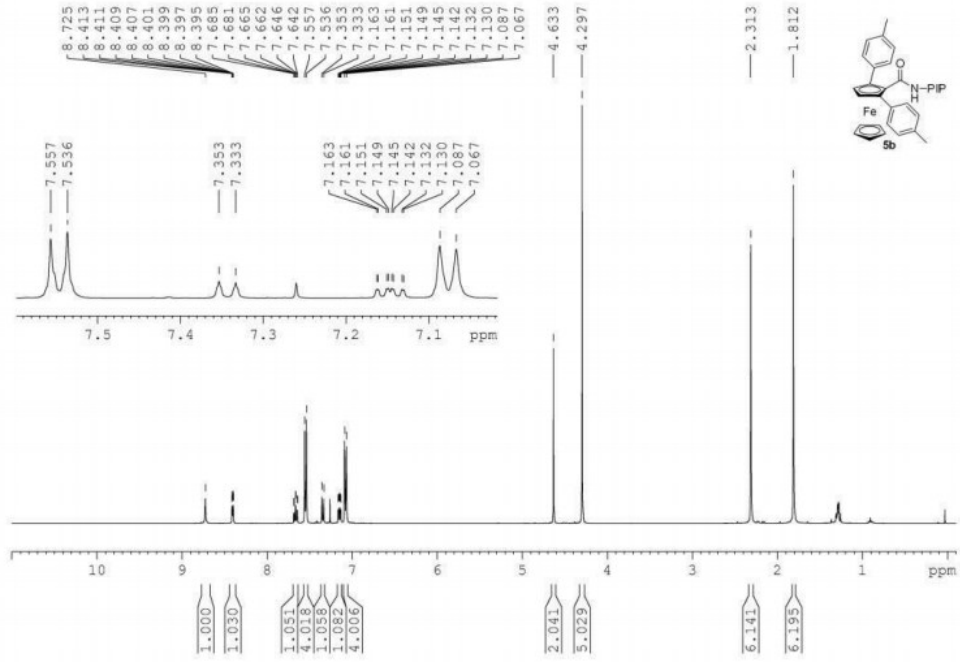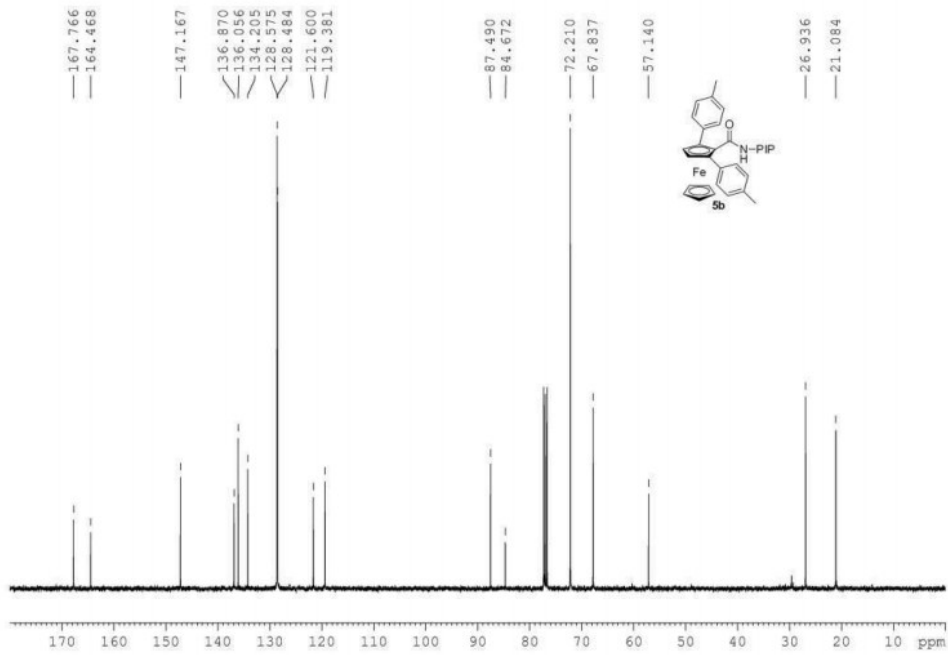

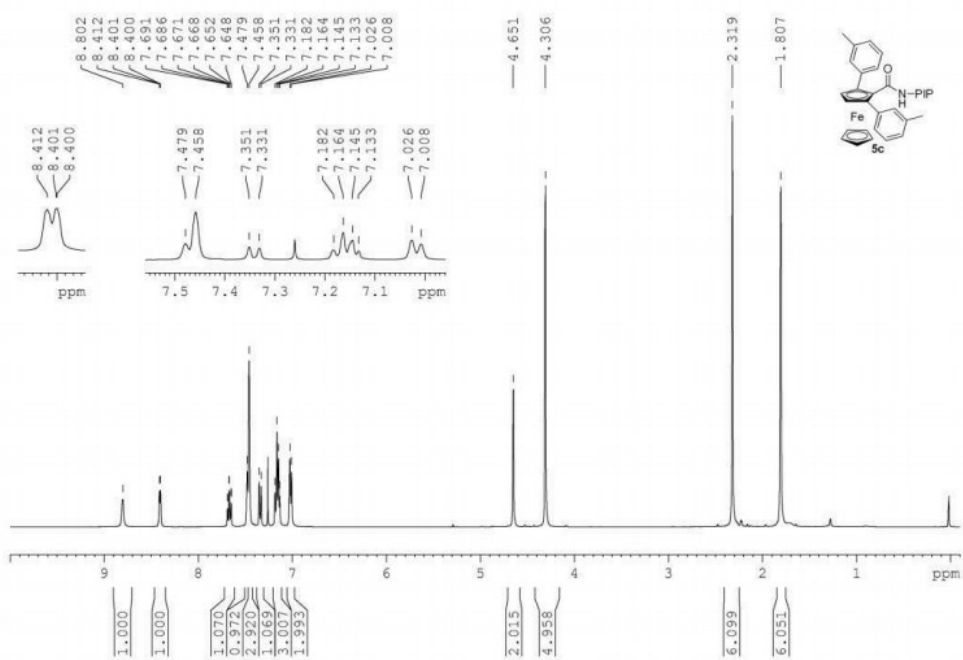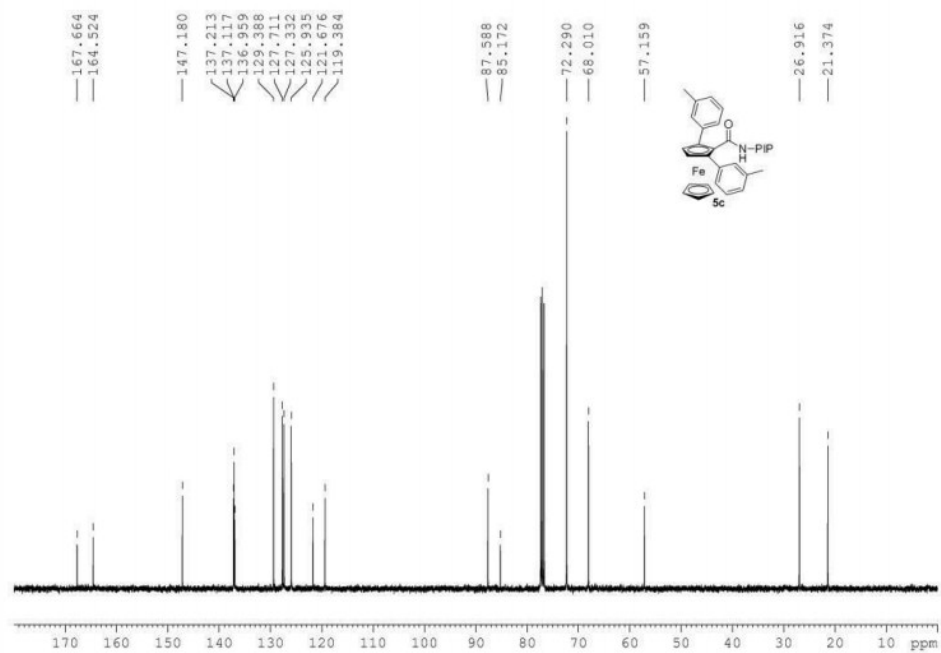



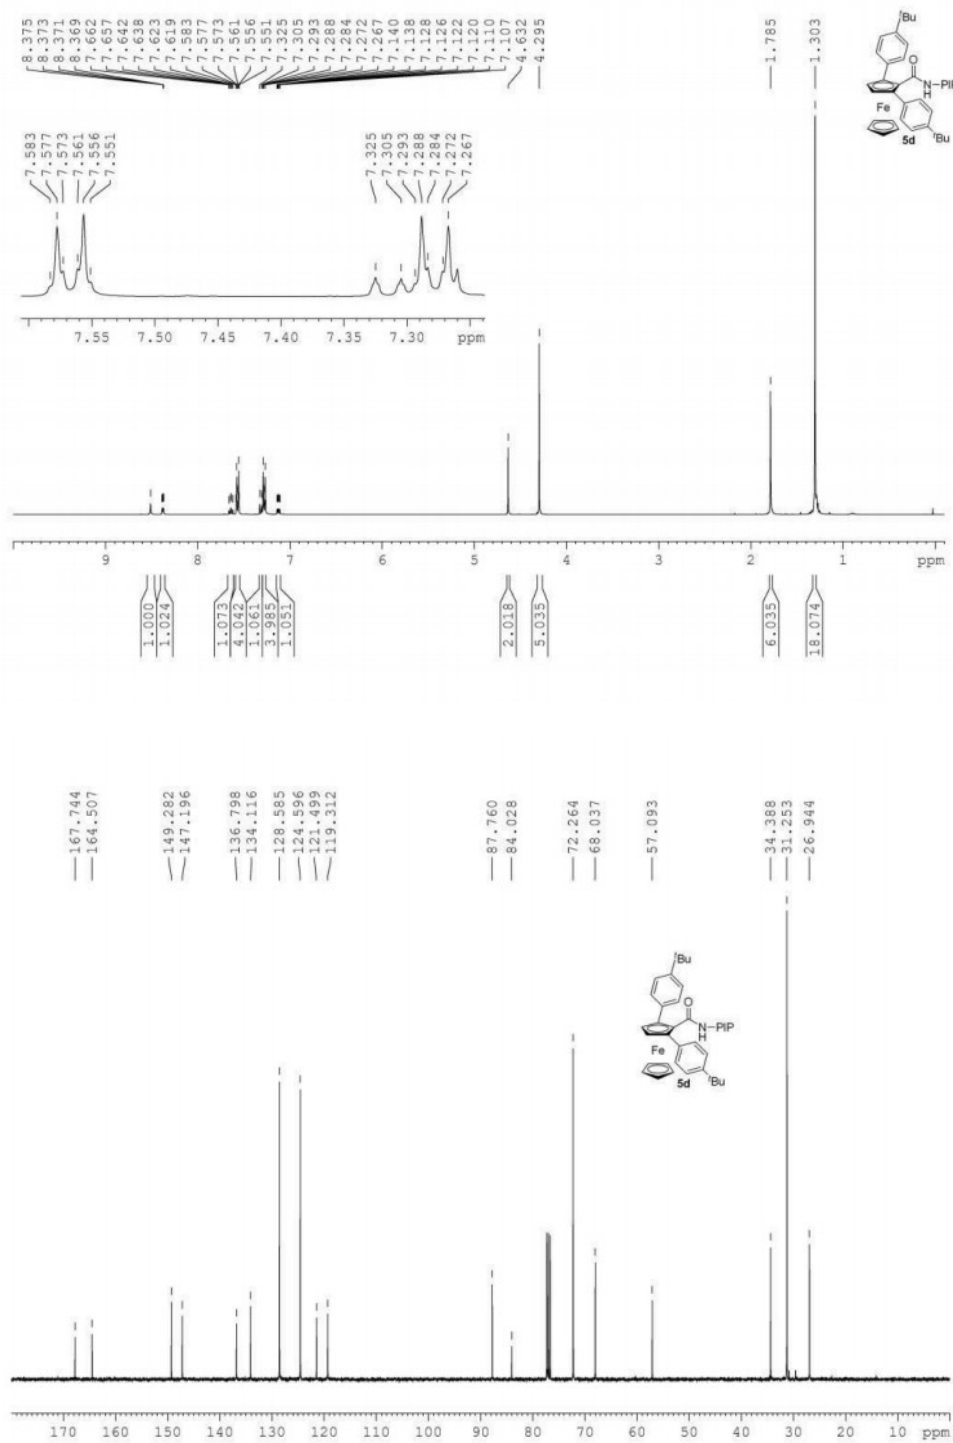

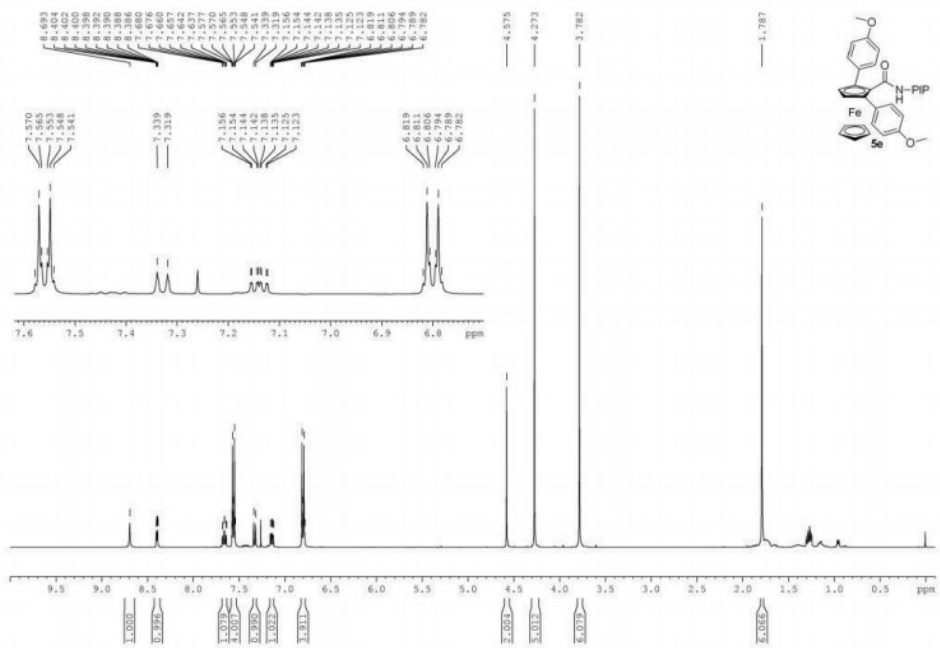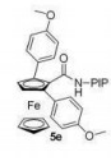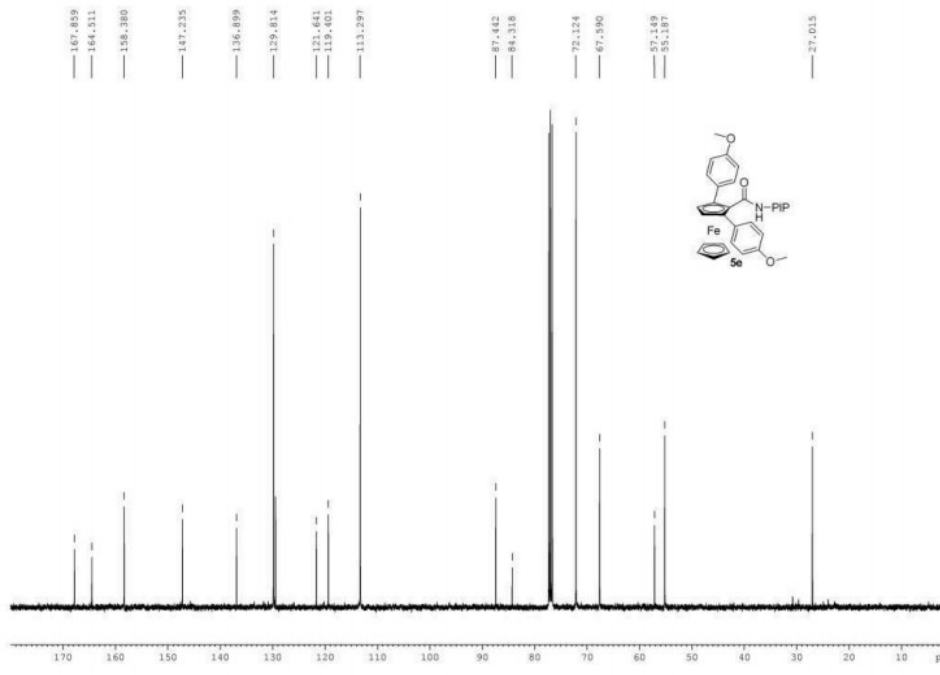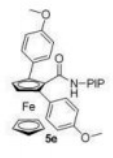

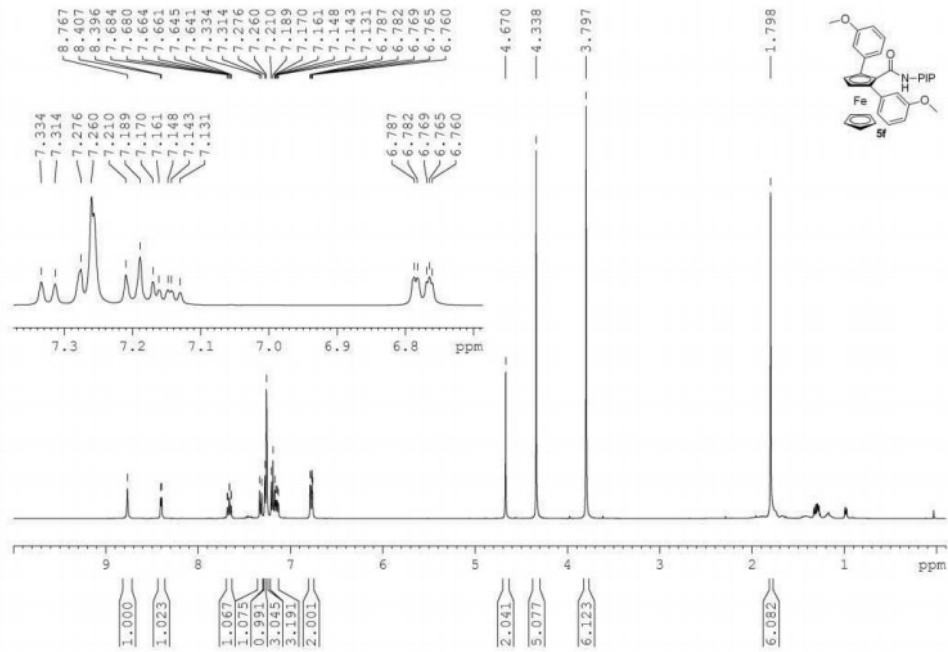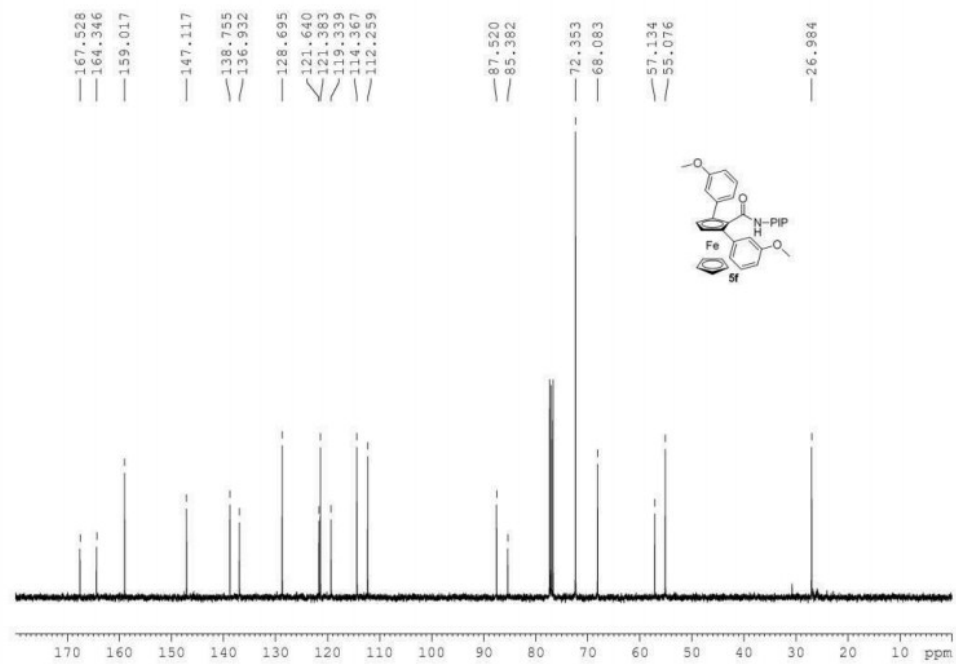

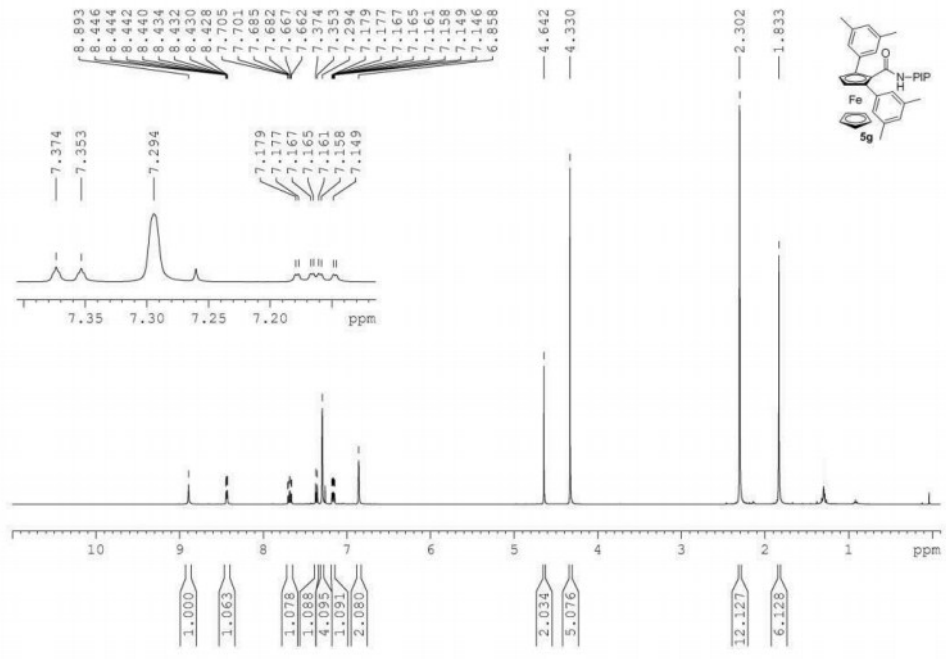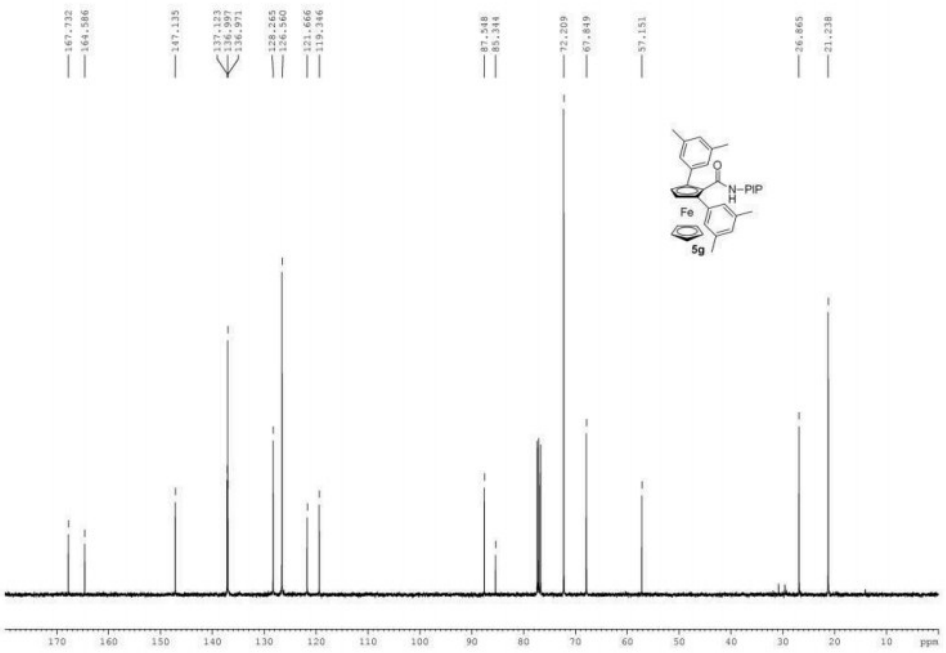

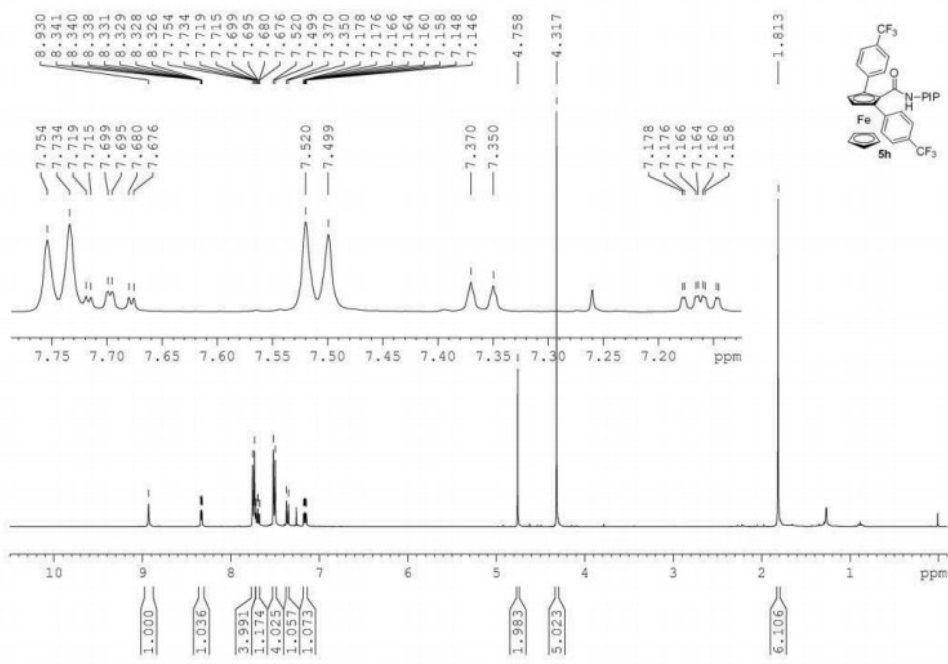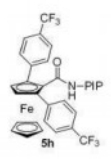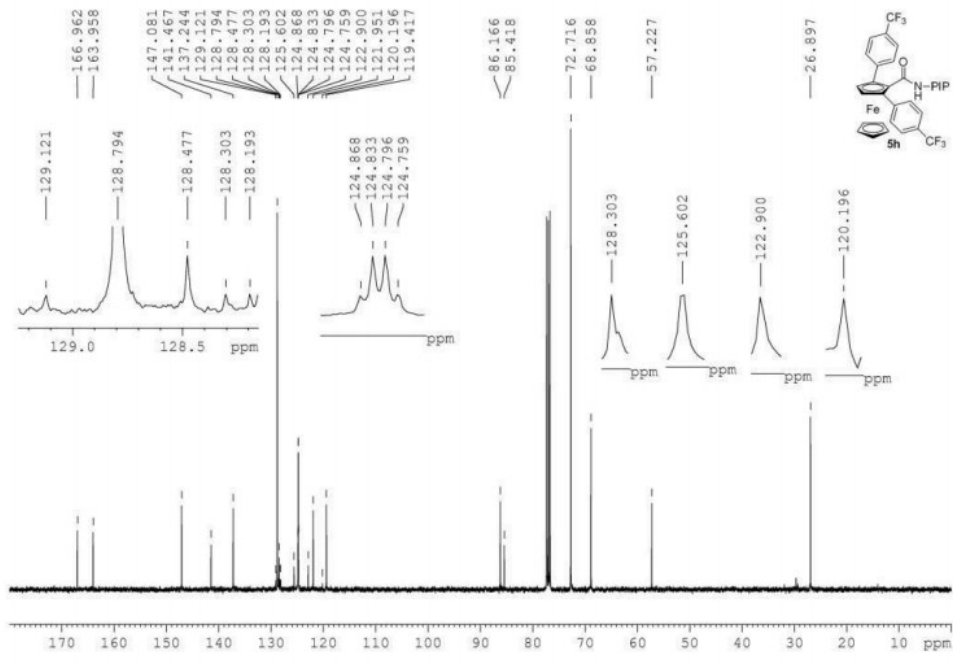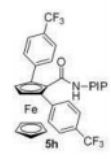

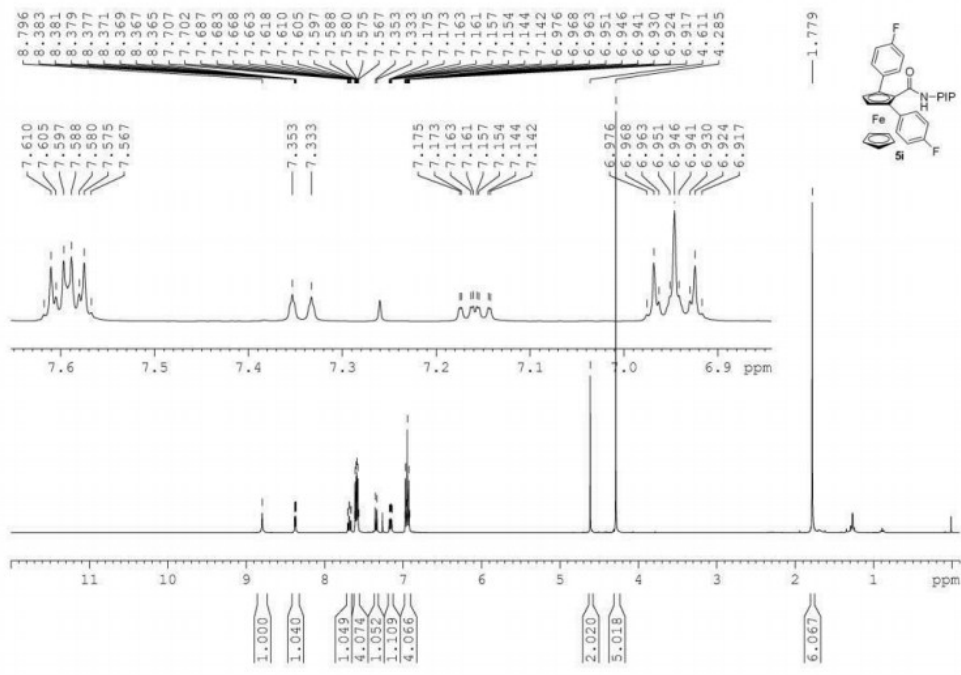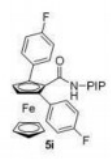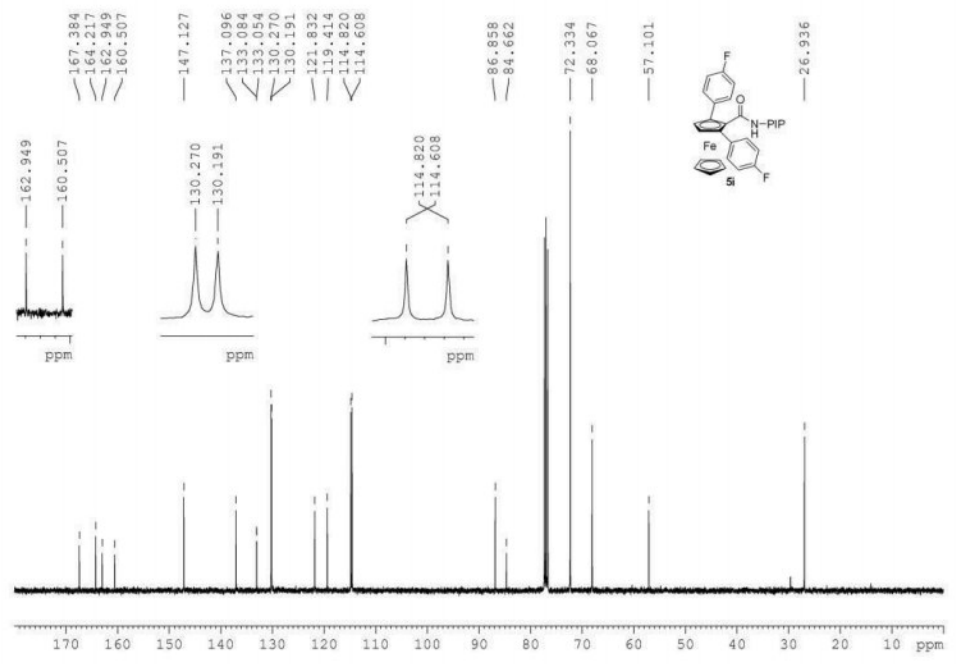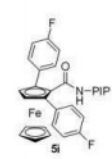

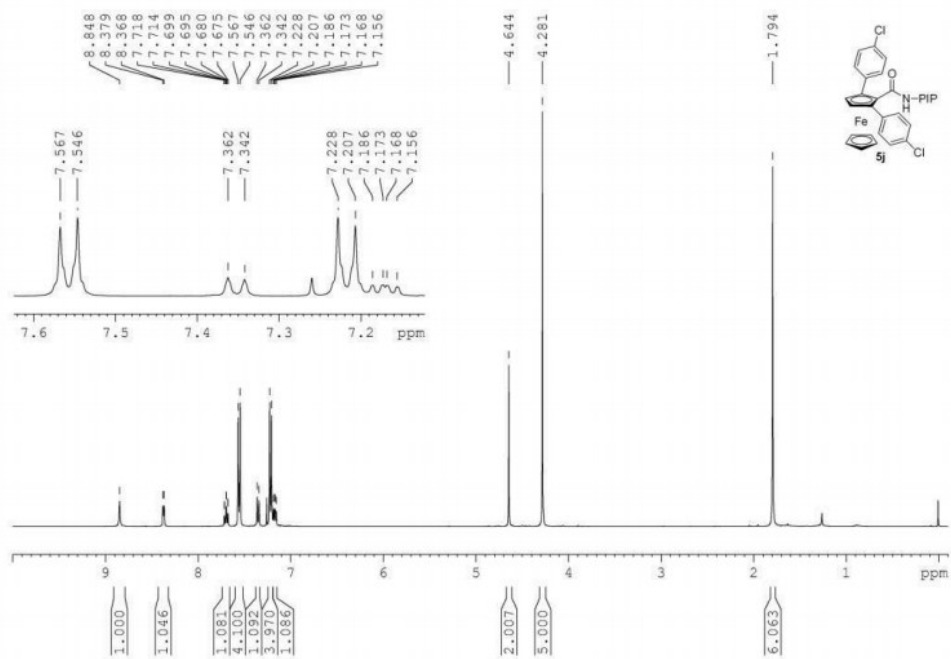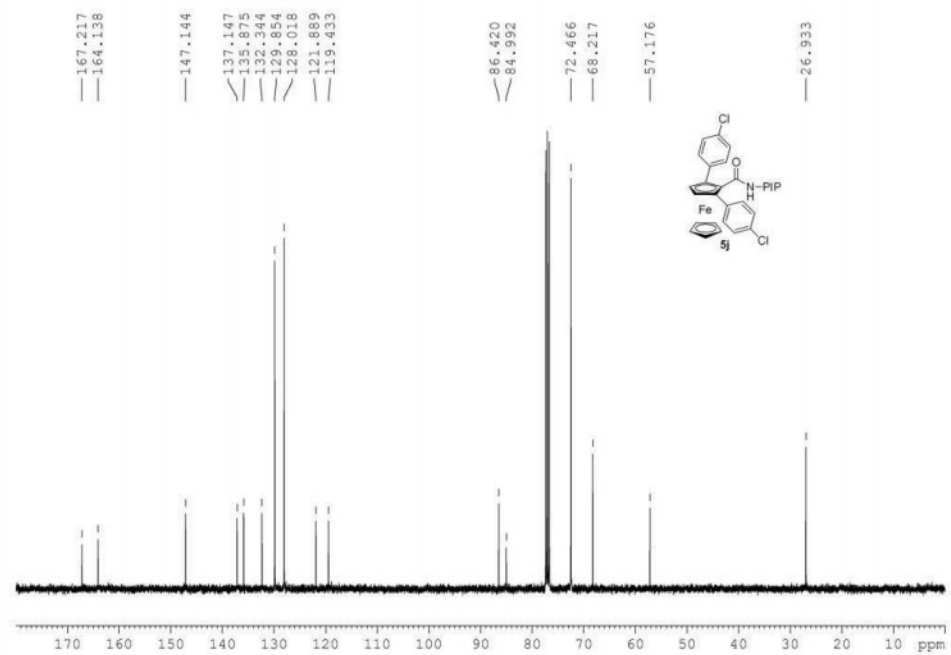

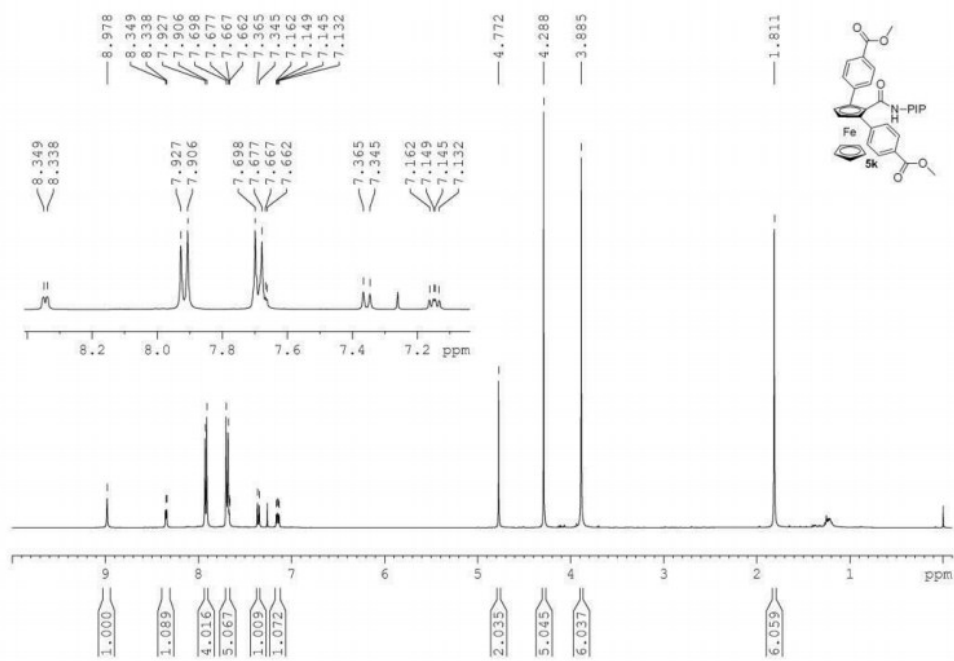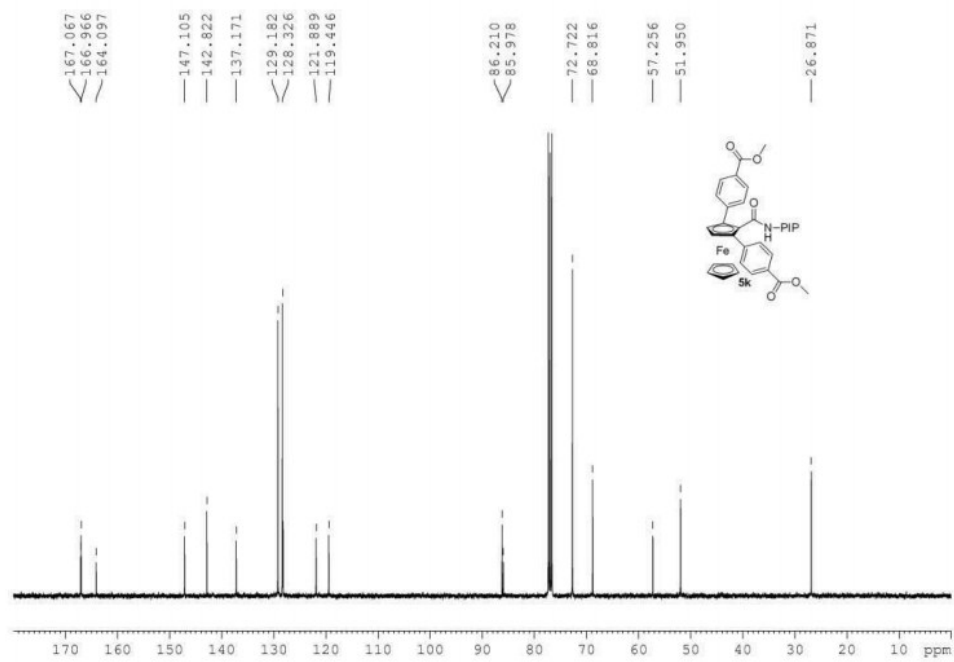



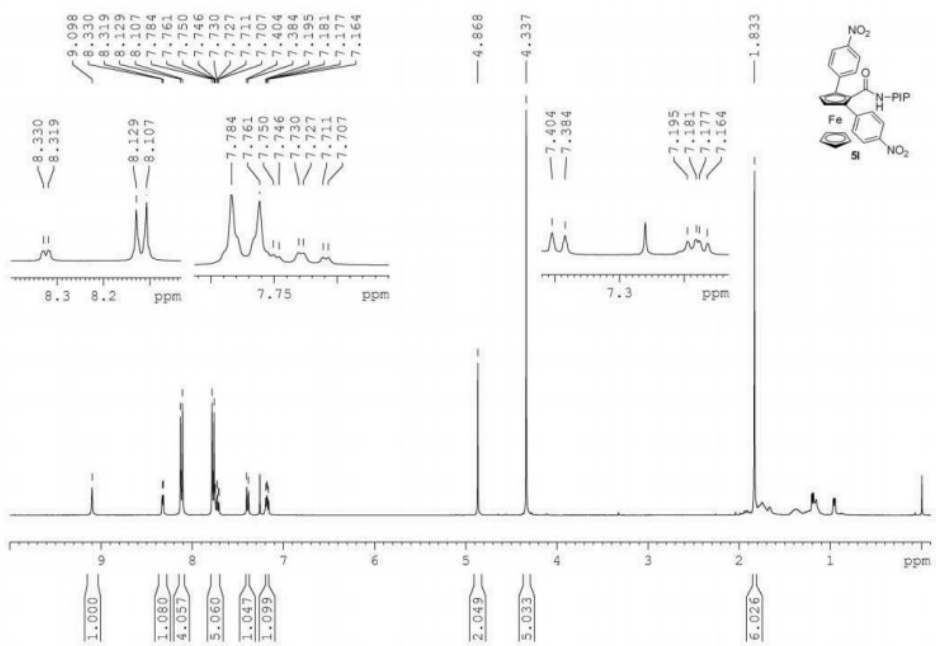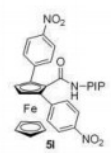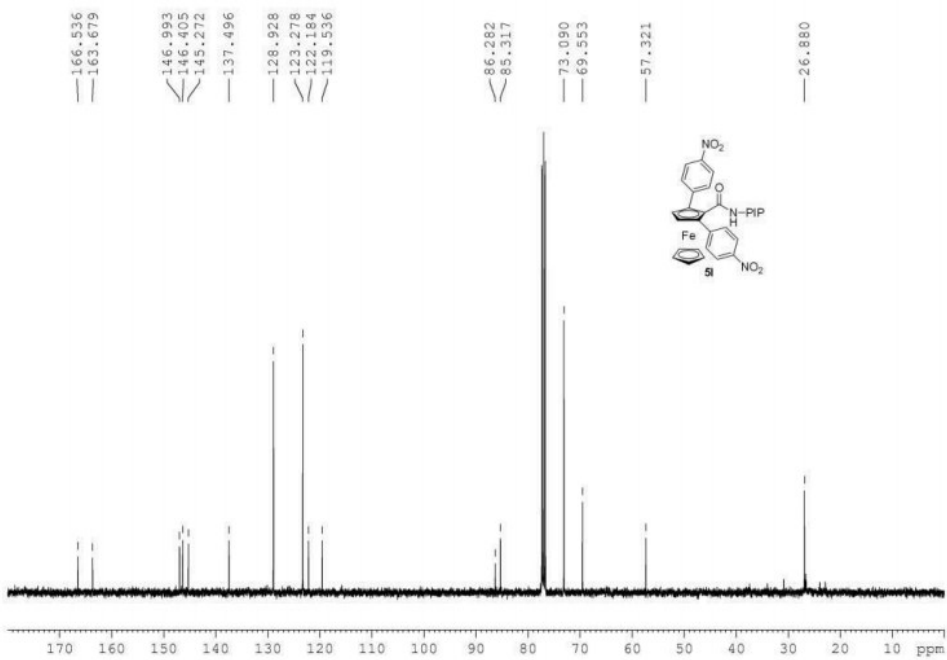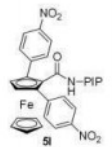

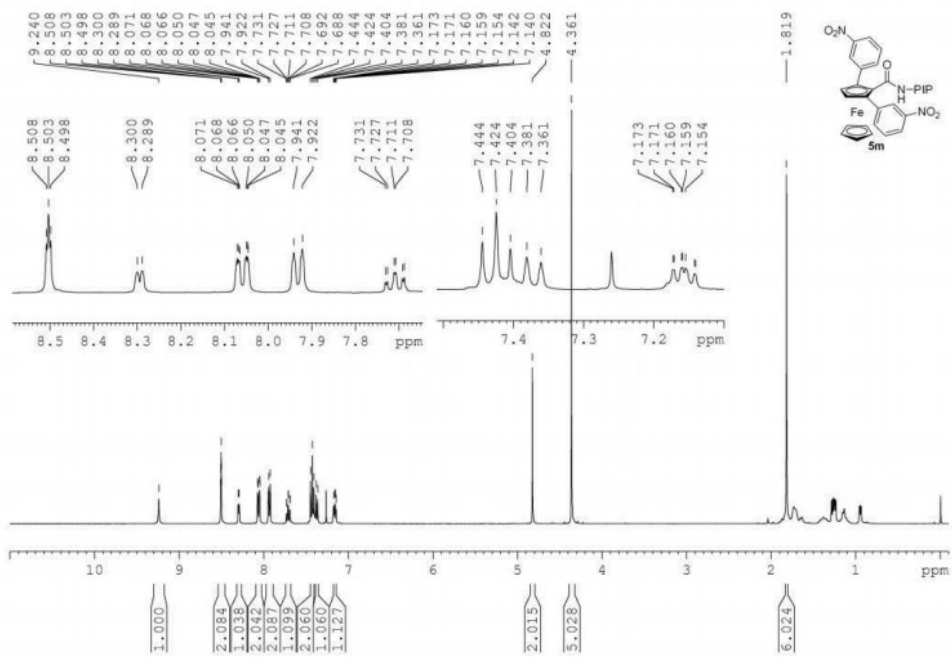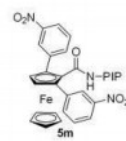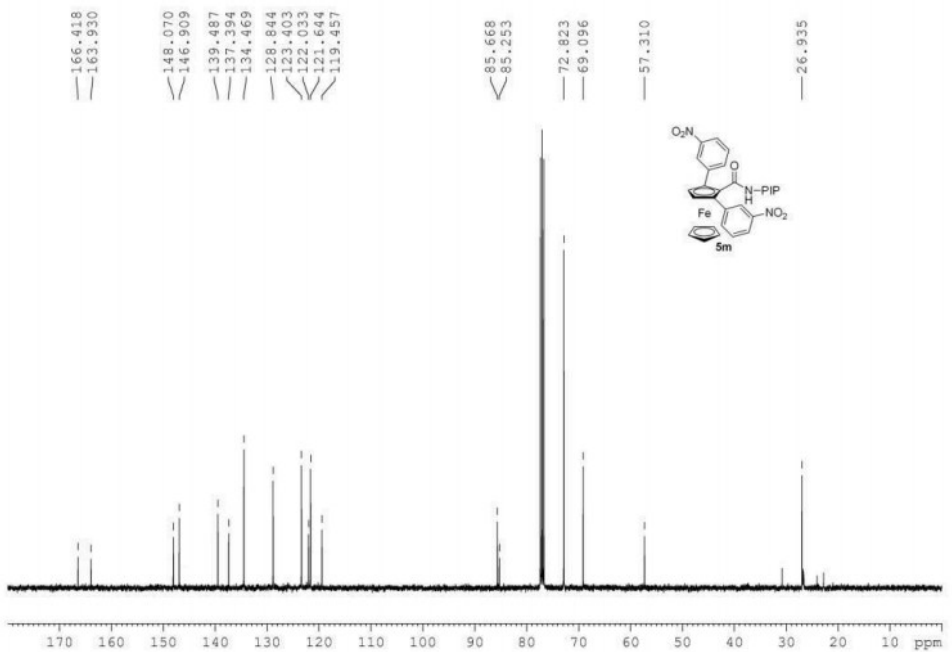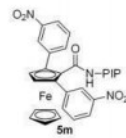

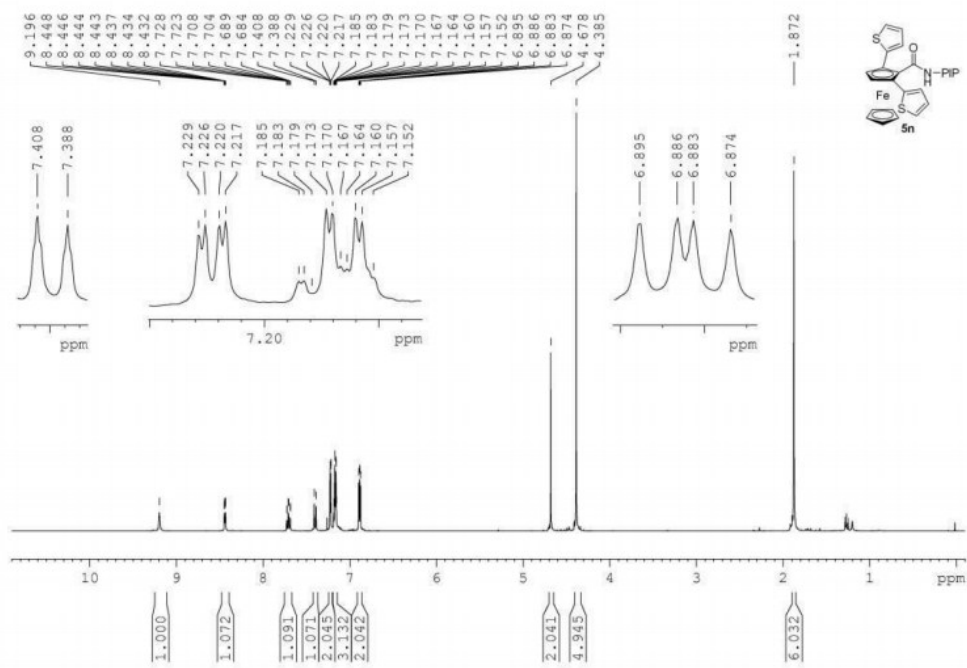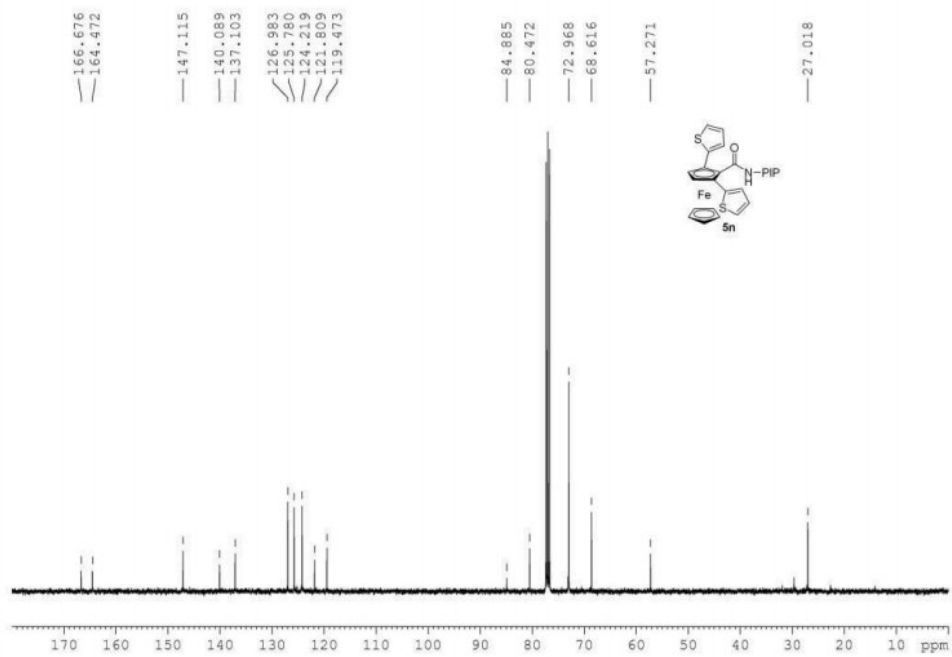

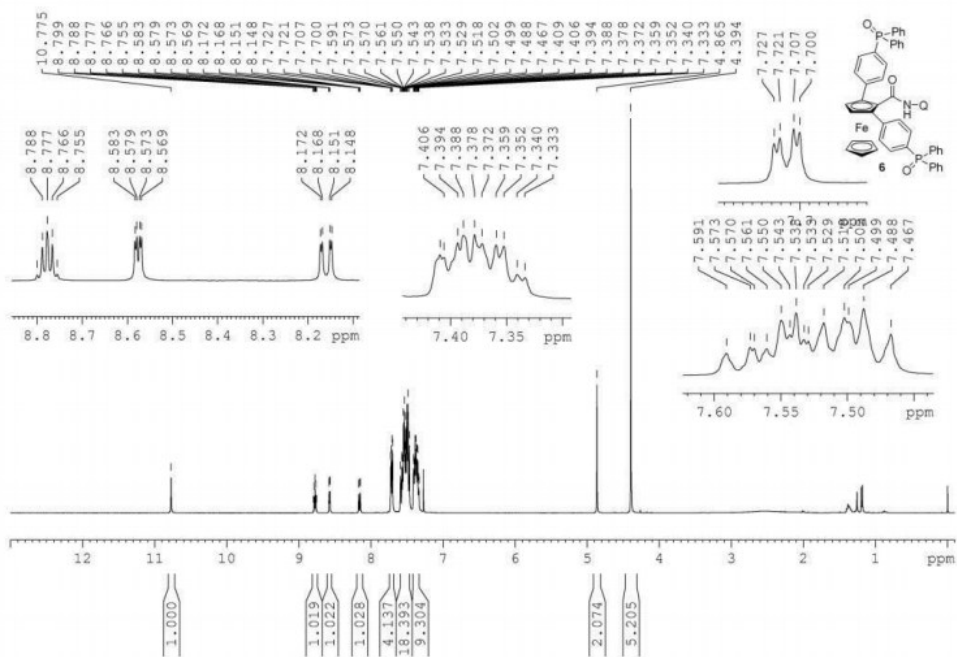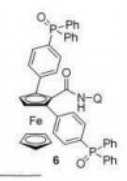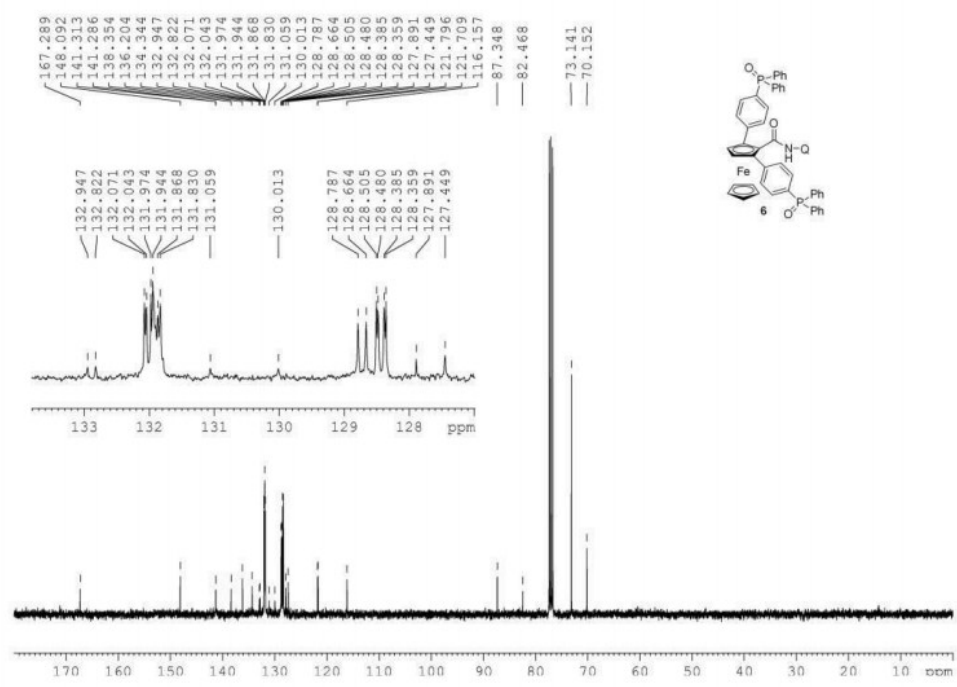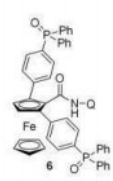

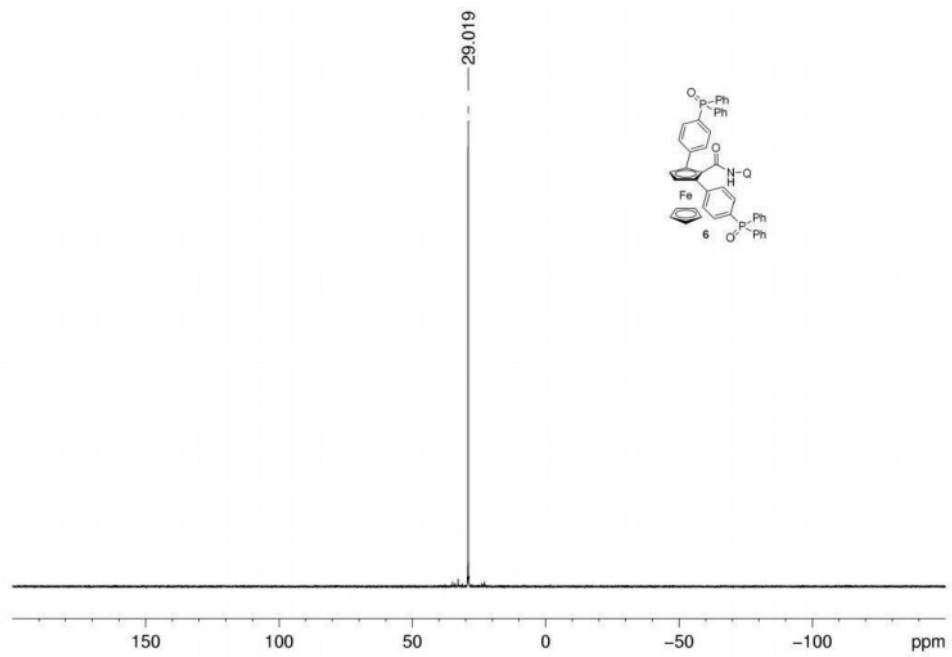

Supplement: c6ra11972g1.pdf [file c6ra11972g1.pdf]
